# Supplementary material for: A Genome-Wide Significant Linkage for Severe Depression on Chromosome 3: The Depression Network Study
Source: Atypon-hosted journal article supplement (doi:10.1176/appi.ajp.2011.10091342), 2011-05-16
Supplement: ajp_168_08_840_01.pdf [file ajp_168_08_840_01.pdf]

| Chr | centiMorgan Position<br>On Decode Map | Marker Name | Cumulative cM | LOD Recurrent<br>Depression | LOD Severe Recurrent<br>Depression | LOD Very Severe<br>Recurrent Depression |
|-----|---------------------------------------|-------------|---------------|-----------------------------|------------------------------------|-----------------------------------------|
| 1   | 4.16                                  | D1S468      | 4.16          | 0.233                       | 0.418                              | 0.273                                   |
| 1   | 11.675                                | D1S2870     | 11.675        | 0.54                        | 0.614                              | 0.152                                   |
| 1   | 13.895                                | D1S508      | 13.895        | 0.577                       | 0.496                              | 0.08                                    |
| 1   | 16.993                                | D1S450      | 16.993        | 0.758                       | 0.549                              | 0.046                                   |
| 1   | 20.363                                | D1S2667     | 20.363        | 0.699                       | 0.25                               | 0                                       |
| 1   | 21.802                                | D1S434      | 21.802        | 0.668                       | 0.179                              | 0                                       |
| 1   | 26.828                                | D1S507      | 26.828        | 0.19                        | 0.023                              | -0.243                                  |
| 1   | 29.075                                | D1S2697     | 29.075        | 0.212                       | 0.106                              | -0.075                                  |
| 1   | 33.028                                | D1S1592     | 33.028        | 0.284                       | 0.239                              | 0                                       |
| 1   | 36.516                                | D1S2644     | 36.516        | 0.329                       | 0.173                              | 0.059                                   |
| 1   | 38.456                                | D1S199      | 38.456        | 0.343                       | 0.173                              | 0.019                                   |
| 1   | 42.192                                | D1S2864     | 42.192        | 0.33                        | 0.256                              | 0.018                                   |
| 1   | 43.936                                | D1S2620     | 43.936        | 0.304                       | 0.299                              | 0.007                                   |
| 1   | 47.417                                | D1S2749     | 47.417        | 0.416                       | 0.27                               | 0.003                                   |
| 1   | 49.492                                | D1S470      | 49.492        | 0.374                       | 0.182                              | 0.016                                   |
| 1   | 54.195                                | D1S241      | 54.195        | 0.519                       | 0.012                              | -0.021                                  |
| 1   | 59.975                                | D1S255      | 59.975        | 0.811                       | 0.022                              | -0.002                                  |
| 1   | 61.476                                | D1S186      | 61.476        | 0.614                       | 0.007                              | -0.01                                   |
| 1   | 68.18                                 | D1S2861     | 68.18         | 0.441                       | 0.013                              | -0.028                                  |
| 1   | 69.428                                | D1S2713     | 69.428        | 0.515                       | 0.081                              | -0.002                                  |
| 1   | 70.483                                | D1S2797     | 70.483        | 0.611                       | 0.121                              | -0.01                                   |
| 1   | 73.675                                | D1S197      | 73.675        | 0.291                       | 0.02                               | -0.035                                  |
| 1   | 78.87                                 | D1S2652     | 78.87         | 0.423                       | 0.059                              | -0.085                                  |
| 1   | 83.244                                | D1S476      | 83.244        | 0.473                       | 0.147                              | -0.067                                  |
| 1   | 84.842                                | D1S220      | 84.842        | 0.439                       | 0.189                              | -0.012                                  |
| 1   | 87.952                                | D1S2846     | 87.952        | 0.253                       | 0.108                              | -0.014                                  |
| 1   | 89.078                                | D1S2788     | 89.078        | 0.144                       | 0.123                              | -0.001                                  |
| 1   | 91.461                                | D1S438      | 91.461        | 0.061                       | 0.147                              | 0.008                                   |
| 1   | 94.913                                | D1S198      | 94.913        | 0.052                       | 0.244                              | 0.08                                    |
| 1   | 98.974                                | D1S219      | 98.974        | 0.012                       | 0.328                              | 0.05                                    |
| 1   | 105.857                               | D1S2841     | 105.857       | 0.006                       | 0.094                              | 0.007                                   |
| 1   | 106.401                               | D1S500      | 106.401       | 0.002                       | 0.067                              | 0.003                                   |
| 1   | 107.366                               | D1S430      | 107.366       | 0.002                       | 0.054                              | 0                                       |
| 1   | 109.073                               | D1S2862     | 109.073       | -0.003                      | 0.005                              | -0.008                                  |
| 1   | 109.232                               | D1S2856     | 109.232       | -0.004                      | 0.004                              | -0.009                                  |
| 1   | 112.106                               | D1S2766     | 112.106       | 0.009                       | 0.081                              | -0.001                                  |
| 1   | 114.169                               | D1S2865     | 114.169       | 0.001                       | 0.074                              | -0.046                                  |
| 1   | 117.67                                | D1S435      | 117.67        | 0.004                       | 0.064                              | 0.002                                   |

| Chr | centiMorgan Position<br>On Decode Map | Marker Name | Cumulative cM | LOD Recurrent<br>Depression | LOD Severe Recurrent<br>Depression | LOD Very Severe<br>Recurrent Depression |
|-----|---------------------------------------|-------------|---------------|-----------------------------|------------------------------------|-----------------------------------------|
| 1   | 118.568                               | D1S2776     | 118.568       | 0.003                       | 0.06                               | 0.003                                   |
| 1   | 121.065                               | D1S2664     | 121.065       | 0.021                       | 0.081                              | 0.013                                   |
| 1   | 124.95                                | D1S206      | 124.95        | -0.012                      | 0.047                              | 0.006                                   |
| 1   | 126.349                               | D1S495      | 126.349       | -0.02                       | 0.061                              | 0.004                                   |
| 1   | 129.083                               | D1S2688     | 129.083       | 0.001                       | 0.075                              | -0.006                                  |
| 1   | 134.61                                | D1S2726     | 134.61        | 0.007                       | -0.04                              | -0.034                                  |
| 1   | 140.46                                | D1S189      | 140.46        | 0.014                       | -0.07                              | 0                                       |
| 1   | 144.724                               | D1S442      | 144.724       | 0.003                       | -0.127                             | 0                                       |
| 1   | 147.704                               | D1S498      | 147.704       | -0.02                       | -0.293                             | -0.011                                  |
| 1   | 154.538                               | D1S1653     | 154.538       | -0.003                      | -0.258                             | -0.135                                  |
| 1   | 159.033                               | D1S2707     | 159.033       | 0.051                       | -0.271                             | -0.261                                  |
| 1   | 160.45                                | D1S484      | 160.45        | 0.09                        | -0.243                             | -0.243                                  |
| 1   | 168.681                               | D1S2628     | 168.681       | -0.009                      | -0.308                             | -0.485                                  |
| 1   | 172.571                               | D1S196      | 172.571       | -0.035                      | -0.09                              | -0.423                                  |
| 1   | 176.386                               | D1S452      | 176.386       | 0                           | 0.024                              | -0.322                                  |
| 1   | 179.561                               | D1S218      | 179.561       | 0                           | 0.225                              | -0.056                                  |
| 1   | 182.551                               | D1S2791     | 182.551       | 0                           | 0.22                               | -0.089                                  |
| 1   | 187.029                               | D1S2818     | 187.029       | -0.011                      | 0.2                                | -0.069                                  |
| 1   | 191.997                               | D1S238      | 191.997       | 0                           | 0.429                              | -0.045                                  |
| 1   | 196.564                               | D1S412      | 196.564       | -0.01                       | 0.421                              | -0.001                                  |
| 1   | 198.523                               | D1S413      | 198.523       | -0.005                      | 0.307                              | -0.034                                  |
| 1   | 203.669                               | D1S2615     | 203.669       | 0.043                       | 0.362                              | -0.011                                  |
| 1   | 208.146                               | D1S2717     | 208.146       | 0.042                       | 0.265                              | 0.005                                   |
| 1   | 210.819                               | D1S249      | 210.819       | 0.022                       | 0.23                               | 0.009                                   |
| 1   | 213.635                               | D1S2685     | 213.635       | 0.049                       | 0.307                              | 0.039                                   |
| 1   | 216.774                               | D1S245      | 216.774       | 0.013                       | 0.423                              | 0.075                                   |
| 1   | 217.215                               | D1S205      | 217.215       | 0.017                       | 0.421                              | 0.075                                   |
| 1   | 222.179                               | D1S237      | 222.179       | -0.01                       | 0.18                               | 0.034                                   |
| 1   | 230.379                               | D1S2641     | 230.379       | -0.02                       | 0.038                              | 0.047                                   |
| 1   | 232.374                               | D1S213      | 232.374       | -0.078                      | 0.008                              | 0.004                                   |
| 1   | 238.23                                | D1S2833     | 238.23        | -0.173                      | 0.25                               | 0.053                                   |
| 1   | 239.64                                | D1S2709     | 239.64        | -0.182                      | 0.284                              | 0.026                                   |
| 1   | 245.862                               | D1S1540     | 245.862       | -0.18                       | 0.212                              | 0                                       |
| 1   | 251.419                               | D1S2850     | 251.419       | -0.453                      | 0.12                               | 0.035                                   |
| 1   | 258.609                               | D1S2670     | 258.609       | -0.075                      | 0.626                              | 0.143                                   |
| 1   | 261.768                               | D1S1594     | 261.768       | -0.068                      | 0.523                              | 0.149                                   |
| 1   | 262.682                               | D1S2785     | 262.682       | -0.063                      | 0.5                                | 0.213                                   |
| 1   | 263.283                               | D1S304      | 263.283       | -0.062                      | 0.461                              | 0.199                                   |

| Chr | centiMorgan Position<br>On Decode Map | Marker Name | Cumulative cM | LOD Recurrent<br>Depression | LOD Severe Recurrent<br>Depression | LOD Very Severe<br>Recurrent Depression |
|-----|---------------------------------------|-------------|---------------|-----------------------------|------------------------------------|-----------------------------------------|
| 1   | 268.006                               | D1S2679     | 268.006       | -0.057                      | 0.377                              | 0.064                                   |
| 2   | 1.989                                 | D2S2268     | 269.995       | 0.035                       | 0.296                              | 0.046                                   |
| 2   | 4.612                                 | D2S323      | 272.618       | 0.024                       | 0.319                              | 0.028                                   |
| 2   | 7.814                                 | D2S319      | 275.82        | 0.004                       | 0.21                               | 0                                       |
| 2   | 11.306                                | D2S2166     | 279.312       | 0                           | 0.058                              | 0.006                                   |
| 2   | 15.744                                | D2S330      | 283.75        | 0                           | 0.016                              | -0.004                                  |
| 2   | 18.385                                | D2S2211     | 286.391       | -0.002                      | 0.005                              | -0.01                                   |
| 2   | 23.523                                | D2S162      | 291.529       | -0.011                      | 0.003                              | 0.03                                    |
| 2   | 27.796                                | D2S398      | 295.802       | 0.011                       | 0.097                              | 0.264                                   |
| 2   | 29.949                                | D2S168      | 297.955       | 0.026                       | 0.108                              | 0.126                                   |
| 2   | 31.276                                | D2S262      | 299.282       | 0.015                       | 0.063                              | 0.051                                   |
| 2   | 35.627                                | D2S149      | 303.633       | 0.261                       | 0.279                              | 0.189                                   |
| 2   | 40.616                                | D2S2346     | 308.622       | 0.057                       | 0.135                              | 0.082                                   |
| 2   | 42.818                                | D2S305      | 310.824       | 0.04                        | 0.031                              | 0.001                                   |
| 2   | 49.373                                | D2S2168     | 317.379       | 0.025                       | -0.003                             | -0.158                                  |
| 2   | 53.103                                | D2S146      | 321.109       | 0.039                       | 0.001                              | -0.135                                  |
| 2   | 56.04                                 | D2S400      | 324.046       | 0.003                       | -0.013                             | -0.19                                   |
| 2   | 59.437                                | D2S367      | 327.443       | -0.012                      | -0.006                             | -0.128                                  |
| 2   | 61.586                                | D2S2230     | 329.592       | -0.083                      | -0.037                             | -0.186                                  |
| 2   | 66.767                                | D2S2328     | 334.773       | -0.283                      | -0.002                             | -0.055                                  |
| 2   | 68.734                                | D2S2259     | 336.74        | -0.328                      | -0.049                             | -0.056                                  |
| 2   | 70.262                                | D2S2294     | 338.268       | -0.424                      | -0.096                             | -0.1                                    |
| 2   | 74.107                                | D2S391      | 342.113       | -0.617                      | -0.112                             | -0.098                                  |
| 2   | 78.417                                | D2S2156     | 346.423       | -0.533                      | -0.076                             | -0.103                                  |
| 2   | 82.827                                | D2S1364     | 350.833       | -0.295                      | -0.005                             | -0.081                                  |
| 2   | 84.658                                | D2S370      | 352.664       | -0.182                      | 0                                  | -0.048                                  |
| 2   | 86.044                                | D2S337      | 354.05        | -0.05                       | 0.015                              | -0.041                                  |
| 2   | 91.392                                | D2S2368     | 359.398       | 0.011                       | 0.108                              | -0.064                                  |
| 2   | 94.616                                | D2S2152     | 362.622       | 0.075                       | 0.133                              | -0.027                                  |
| 2   | 99.577                                | D2S2110     | 367.583       | 0.227                       | 0.202                              | 0.017                                   |
| 2   | 102.428                               | D2S286      | 370.434       | 0.097                       | 0.291                              | 0.026                                   |
| 2   | 103.502                               | D2S2116     | 371.508       | 0.045                       | 0.269                              | 0.051                                   |
| 2   | 105.04                                | D2S1777     | 373.046       | 0.041                       | 0.296                              | 0.046                                   |
| 2   | 109.63                                | D2S428      | 377.636       | 0.008                       | 0.18                               | 0                                       |
| 2   | 112.751                               | D2S388      | 380.757       | 0                           | 0.107                              | -0.01                                   |
| 2   | 114.147                               | D2S2216     | 382.153       | 0.004                       | 0.156                              | -0.004                                  |
| 2   | 118.855                               | D2S2264     | 386.861       | 0                           | 0.025                              | -0.007                                  |
| 2   | 122.551                               | D2S293      | 390.557       | -0.008                      | -0.002                             | -0.119                                  |

| Chr | centiMorgan Position<br>On Decode Map | Marker Name | Cumulative cM | LOD Recurrent<br>Depression | LOD Severe Recurrent<br>Depression | LOD Very Severe<br>Recurrent Depression |
|-----|---------------------------------------|-------------|---------------|-----------------------------|------------------------------------|-----------------------------------------|
| 2   | 127.708                               | D2S1896     | 395.714       | -0.074                      | -0.04                              | -0.393                                  |
| 2   | 130.95                                | D2S363      | 398.956       | -0.155                      | -0.103                             | -0.705                                  |
| 2   | 132.186                               | D2S2254     | 400.192       | -0.145                      | -0.126                             | -0.92                                   |
| 2   | 138.309                               | D2S347      | 406.315       | -0.091                      | -0.009                             | -0.577                                  |
| 2   | 143.62                                | D2S2271     | 411.626       | -0.181                      | -0.005                             | -0.656                                  |
| 2   | 145.454                               | D2S2215     | 413.46        | -0.056                      | -0.004                             | -0.764                                  |
| 2   | 149.545                               | D2S2256     | 417.551       | -0.006                      | 0.009                              | -0.254                                  |
| 2   | 152.91                                | D2S2196     | 420.916       | -0.028                      | -0.003                             | -0.058                                  |
| 2   | 156.818                               | D2S349      | 424.824       | -0.003                      | -0.007                             | -0.018                                  |
| 2   | 160.987                               | D2S151      | 428.993       | -0.077                      | -0.203                             | -0.114                                  |
| 2   | 163.62                                | D2S2324     | 431.626       | -0.076                      | -0.235                             | -0.096                                  |
| 2   | 163.898                               | D2S2277     | 431.904       | -0.075                      | -0.228                             | -0.095                                  |
| 2   | 168.829                               | D2S142      | 436.835       | -0.127                      | -0.149                             | -0.018                                  |
| 2   | 171.626                               | D2S1353     | 439.632       | -0.179                      | -0.244                             | -0.033                                  |
| 2   | 174.846                               | D2S2330     | 442.852       | -0.068                      | -0.116                             | -0.001                                  |
| 2   | 181.248                               | D2S2284     | 449.254       | 0.004                       | -0.013                             | -0.025                                  |
| 2   | 181.956                               | D2S335      | 449.962       | 0.026                       | 0.003                              | -0.009                                  |
| 2   | 186.247                               | D2S2188     | 454.253       | 0.15                        | 0.093                              | 0.003                                   |
| 2   | 192                                   | D2S364      | 460.006       | 0.131                       | 0.302                              | 0.122                                   |
| 2   | 195.342                               | D2S118      | 463.348       | 0.003                       | 0.176                              | 0.221                                   |
| 2   | 199.069                               | D2S117      | 467.075       | -0.27                       | 0.004                              | 0.012                                   |
| 2   | 200.705                               | D2S311      | 468.711       | -0.255                      | 0.006                              | 0.013                                   |
| 2   | 202.939                               | D2S116      | 470.945       | -0.249                      | 0.006                              | 0.013                                   |
| 2   | 208.816                               | D2S2358     | 476.822       | -0.428                      | -0.004                             | -0.001                                  |
| 2   | 209.449                               | D2S2321     | 477.455       | -0.347                      | 0                                  | 0                                       |
| 2   | 213.808                               | D2S317      | 481.814       | -0.417                      | -0.003                             | -0.003                                  |
| 2   | 216.936                               | D2S2361     | 484.942       | -0.131                      | 0.002                              | -0.012                                  |
| 2   | 218.524                               | D2S2382     | 486.53        | -0.084                      | 0                                  | -0.03                                   |
| 2   | 223.957                               | D2S2244     | 491.963       | 0                           | 0.072                              | 0.076                                   |
| 2   | 226.246                               | D2S163      | 494.252       | 0.016                       | 0.195                              | 0.236                                   |
| 2   | 228.27                                | D2S126      | 496.276       | 0.029                       | 0.205                              | 0.187                                   |
| 2   | 232.122                               | D2S133      | 500.128       | 0.042                       | 0.23                               | 0.186                                   |
| 2   | 238.908                               | D2S362      | 506.914       | 0.024                       | 0.158                              | 0.071                                   |
| 2   | 239.771                               | D2S2297     | 507.777       | 0.002                       | 0.086                              | 0.042                                   |
| 2   | 242.633                               | D2S427      | 510.639       | -0.032                      | 0.072                              | 0.043                                   |
| 2   | 244.51                                | D2S2344     | 512.516       | -0.06                       | 0.07                               | 0.057                                   |
| 2   | 250.574                               | D2S2973     | 518.58        | -0.158                      | 0.211                              | 0.208                                   |
| 2   | 253.232                               | D2S2202     | 521.238       | -0.278                      | 0.15                               | 0.22                                    |

| Chr | centiMorgan Position<br>On Decode Map | Marker Name | Cumulative cM | LOD Recurrent<br>Depression | LOD Severe Recurrent<br>Depression | LOD Very Severe<br>Recurrent Depression |
|-----|---------------------------------------|-------------|---------------|-----------------------------|------------------------------------|-----------------------------------------|
| 2   | 253.84                                | D2S338      | 521.846       | -0.191                      | 0.256                              | 0.256                                   |
| 2   | 264.008                               | D2S125      | 532.014       | 0.085                       | 0.99                               | 0.54                                    |
| 2   | 264.167                               | D2S395      | 532.173       | 0.079                       | 0.957                              | 0.538                                   |
| 2   | 265.28                                | D2S140      | 533.286       | 0.053                       | 0.836                              | 0.477                                   |
| 3   | 1.076                                 | D3S4559     | 534.362       | 0.148                       | 0.929                              | 0.318                                   |
| 3   | 2.606                                 | D3S1307     | 535.892       | 0.176                       | 0.971                              | 0.299                                   |
| 3   | 3.277                                 | D3S1270     | 536.563       | 0.166                       | 0.991                              | 0.278                                   |
| 3   | 5.052                                 | D3S1297     | 538.338       | 0.131                       | 1.105                              | 0.207                                   |
| 3   | 6.223                                 | D3S3630     | 539.509       | 0.122                       | 1.085                              | 0.158                                   |
| 3   | 10.68                                 | D3S3050     | 543.966       | 0.328                       | 1.265                              | 0.157                                   |
| 3   | 13.274                                | D3S3706     | 546.56        | 0.516                       | 1.9                                | 0.326                                   |
| 3   | 16.205                                | D3S2397     | 549.491       | 0.918                       | 2.678                              | 0.565                                   |
| 3   | 19.885                                | D3S1515     | 553.171       | 1.544                       | 3.997                              | 1.06                                    |
| 3   | 23.902                                | D3S3591     | 557.188       | 1.738                       | 3.686                              | 1.788                                   |
| 3   | 30.71                                 | D3S1263     | 563.996       | 0.914                       | 2.124                              | 1.585                                   |
| 3   | 33.554                                | D3S2385     | 566.84        | 0.925                       | 1.839                              | 1.595                                   |
| 3   | 38.726                                | D3S2338     | 572.012       | 1.026                       | 1.914                              | 1.311                                   |
| 3   | 44.627                                | D3S1293     | 577.913       | 1.018                       | 1.587                              | 1.136                                   |
| 3   | 48.027                                | D3S1567     | 581.313       | 0.758                       | 1.233                              | 1.222                                   |
| 3   | 50.396                                | D3S2335     | 583.682       | 0.588                       | 0.975                              | 0.974                                   |
| 3   | 52.218                                | D3S1266     | 585.504       | 0.338                       | 0.481                              | 0.639                                   |
| 3   | 56.447                                | D3S3547     | 589.733       | 0.567                       | 0.546                              | 0.446                                   |
| 3   | 62.047                                | D3S1612     | 595.333       | 0.802                       | 0.694                              | 0.547                                   |
| 3   | 66.396                                | D3S3521     | 599.682       | 0.622                       | 0.451                              | 0.481                                   |
| 3   | 67.507                                | D3S3522     | 600.793       | 0.549                       | 0.417                              | 0.411                                   |
| 3   | 70.479                                | D3S3597     | 603.765       | 0.84                        | 0.731                              | 0.469                                   |
| 3   | 76.709                                | D3S3672     | 609.995       | 0.684                       | 0.615                              | 0.576                                   |
| 3   | 80.932                                | D3S3532     | 614.218       | 0.792                       | 0.853                              | 0.759                                   |
| 3   | 83.472                                | D3S1234     | 616.758       | 0.705                       | 0.879                              | 0.724                                   |
| 3   | 89.04                                 | D3S1600     | 622.326       | 0.203                       | 0.392                              | 0.352                                   |
| 3   | 90.594                                | D3S1287     | 623.88        | 0.138                       | 0.375                              | 0.314                                   |
| 3   | 97.19                                 | D3S1566     | 630.476       | 0.04                        | 0.402                              | 0.404                                   |
| 3   | 99.228                                | D3S3551     | 632.514       | 0.068                       | 0.391                              | 0.47                                    |
| 3   | 100.828                               | D3S3614     | 634.114       | 0.069                       | 0.328                              | 0.46                                    |
| 3   | 106.925                               | D3S3653     | 640.211       | 0.035                       | 0.222                              | 0.24                                    |
| 3   | 110.344                               | D3S3508     | 643.63        | 0.001                       | 0.078                              | 0.228                                   |
| 3   | 111.309                               | D3S2388     | 644.595       | -0.012                      | 0.021                              | 0.195                                   |
| 3   | 111.553                               | D3S1276     | 644.839       | -0.021                      | 0.02                               | 0.199                                   |

| Chr | centiMorgan Position<br>On Decode Map | Marker Name | Cumulative cM | LOD Recurrent<br>Depression | LOD Severe Recurrent<br>Depression | LOD Very Severe<br>Recurrent Depression |
|-----|---------------------------------------|-------------|---------------|-----------------------------|------------------------------------|-----------------------------------------|
| 3   | 115.243                               | D3S1271     | 648.529       | -0.023                      | 0.017                              | 0.068                                   |
| 3   | 120.29                                | D3S3045     | 653.576       | 0                           | 0.107                              | 0.07                                    |
| 3   | 124.142                               | D3S3683     | 657.428       | 0.338                       | 0.886                              | 0.356                                   |
| 3   | 124.633                               | D3S3585     | 657.919       | 0.357                       | 0.849                              | 0.337                                   |
| 3   | 126.997                               | D3S1575     | 660.283       | 0.566                       | 1.038                              | 0.292                                   |
| 3   | 128.935                               | D3S1558     | 662.221       | 0.714                       | 1.102                              | 0.199                                   |
| 3   | 129.73                                | D3S3515     | 663.016       | 0.545                       | 0.783                              | 0.183                                   |
| 3   | 133.534                               | D3S1267     | 666.82        | 0.18                        | 0.482                              | 0.022                                   |
| 3   | 134.648                               | D3S3646     | 667.934       | 0.162                       | 0.522                              | 0.049                                   |
| 3   | 136.43                                | D3S1589     | 669.716       | 0.063                       | 0.401                              | -0.001                                  |
| 3   | 142.175                               | D3S1292     | 675.461       | 0.051                       | 0.172                              | -0.017                                  |
| 3   | 146.456                               | D3S3637     | 679.742       | 0.001                       | 0.196                              | -0.022                                  |
| 3   | 154.11                                | D3S1569     | 687.396       | 0.156                       | 0.393                              | 0.019                                   |
| 3   | 155.856                               | D3S1593     | 689.142       | 0.18                        | 0.264                              | 0.032                                   |
| 3   | 160.668                               | D3S1308     | 693.954       | 0.137                       | 0.08                               | 0.004                                   |
| 3   | 163.84                                | D3S1279     | 697.126       | 0.069                       | 0.007                              | 0                                       |
| 3   | 168.315                               | D3S1607     | 701.601       | 0.05                        | 0.015                              | 0.009                                   |
| 3   | 171.185                               | D3S3668     | 704.471       | 0.029                       | 0.009                              | 0.005                                   |
| 3   | 175.208                               | D3S1564     | 708.494       | 0.013                       | 0.043                              | 0.04                                    |
| 3   | 178.272                               | D3S3725     | 711.558       | 0.014                       | 0.137                              | 0.067                                   |
| 3   | 181.867                               | D3S1565     | 715.153       | 0                           | 0.232                              | 0.352                                   |
| 3   | 186.392                               | D3S3041     | 719.678       | -0.077                      | 0.12                               | 0.262                                   |
| 3   | 189.976                               | D3S3699     | 723.262       | -0.042                      | 0.036                              | 0.232                                   |
| 3   | 193.372                               | D3S1618     | 726.658       | -0.017                      | 0.01                               | 0.207                                   |
| 3   | 195.053                               | D3S3592     | 728.339       | -0.011                      | 0.018                              | 0.22                                    |
| 3   | 198.552                               | D3S1262     | 731.838       | 0.107                       | 0.149                              | 0.593                                   |
| 3   | 201.907                               | D3S3600     | 735.193       | 0.201                       | 0.284                              | 0.757                                   |
| 3   | 206.428                               | D3S1580     | 739.714       | 0.276                       | 0.378                              | 0.647                                   |
| 3   | 209.8                                 | D3S3043     | 743.086       | 0.202                       | 0.391                              | 0.852                                   |
| 3   | 213.152                               | D3S3663     | 746.438       | 0.112                       | 0.279                              | 0.592                                   |
| 3   | 214.298                               | D3S3669     | 747.584       | 0.09                        | 0.251                              | 0.585                                   |
| 3   | 219.969                               | D3S240      | 753.255       | 0.024                       | 0.124                              | 0.272                                   |
| 3   | 222.338                               | D3S1265     | 755.624       | 0.007                       | 0.075                              | 0.143                                   |
| 3   | 225.046                               | D3S1311     | 758.332       | 0.021                       | 0.015                              | 0.012                                   |
| 4   | 0.904                                 | D4S2936     | 759.236       | 0.324                       | 0.6                                | -0.012                                  |
| 4   | 4.567                                 | D4S412      | 762.899       | 0.203                       | 0.45                               | -0.161                                  |
| 4   | 7.377                                 | D4S3023     | 765.709       | 0.509                       | 0.812                              | -0.023                                  |
| 4   | 12.909                                | D4S431      | 771.241       | 0.185                       | 0.368                              | -0.147                                  |

| Chr | centiMorgan Position<br>On Decode Map | Marker Name | Cumulative cM | LOD Recurrent<br>Depression | LOD Severe Recurrent<br>Depression | LOD Very Severe<br>Recurrent Depression |
|-----|---------------------------------------|-------------|---------------|-----------------------------|------------------------------------|-----------------------------------------|
| 4   | 13.305                                | D4S2935     | 771.637       | 0.153                       | 0.372                              | -0.14                                   |
| 4   | 15.279                                | D4S394      | 773.611       | 0.075                       | 0.337                              | -0.218                                  |
| 4   | 22.333                                | D4S2923     | 780.665       | -0.006                      | -0.064                             | -1.125                                  |
| 4   | 23.836                                | D4S2928     | 782.168       | -0.015                      | -0.139                             | -1.142                                  |
| 4   | 27.833                                | D4S403      | 786.165       | -0.052                      | -0.155                             | -0.626                                  |
| 4   | 30.101                                | D4S1511     | 788.433       | -0.041                      | -0.162                             | -0.681                                  |
| 4   | 32.247                                | D4S3341     | 790.579       | -0.053                      | -0.177                             | -0.674                                  |
| 4   | 40.998                                | D4S404      | 799.33        | -0.021                      | -0.254                             | -0.148                                  |
| 4   | 43.893                                | D4S3022     | 802.225       | -0.014                      | -0.173                             | -0.122                                  |
| 4   | 48.955                                | D4S391      | 807.287       | -0.087                      | -0.477                             | -0.123                                  |
| 4   | 54.036                                | D4S2912     | 812.368       | -0.097                      | -0.156                             | -0.005                                  |
| 4   | 55.944                                | D4S1587     | 814.276       | -0.218                      | -0.214                             | -0.013                                  |
| 4   | 62.104                                | D4S405      | 820.436       | -0.328                      | -0.278                             | -0.015                                  |
| 4   | 66.522                                | D4S1627     | 824.854       | -0.162                      | -0.272                             | 0                                       |
| 4   | 68.763                                | D4S2971     | 827.095       | -0.121                      | -0.226                             | 0.022                                   |
| 4   | 71.03                                 | D4S428      | 829.362       | -0.097                      | -0.174                             | 0.001                                   |
| 4   | 73.738                                | D4S3000     | 832.07        | -0.088                      | -0.189                             | 0                                       |
| 4   | 77.905                                | D4S398      | 836.237       | -0.005                      | -0.096                             | 0.009                                   |
| 4   | 80.14                                 | D4S3004     | 838.472       | -0.014                      | -0.088                             | 0.054                                   |
| 4   | 81.583                                | D4S2367     | 839.915       | -0.044                      | -0.16                              | 0.015                                   |
| 4   | 84.721                                | D4S2389     | 843.053       | -0.129                      | -0.223                             | 0.011                                   |
| 4   | 90.596                                | D4S2963     | 848.928       | -0.243                      | -0.035                             | 0.08                                    |
| 4   | 92.447                                | D4S1553     | 850.779       | -0.092                      | 0                                  | 0.161                                   |
| 4   | 94.748                                | D4S2361     | 853.08        | -0.003                      | 0.017                              | 0.287                                   |
| 4   | 99.464                                | D4S2460     | 857.796       | 0.04                        | 0.054                              | 0.472                                   |
| 4   | 102.697                               | D4S423      | 861.029       | 0.079                       | 0.062                              | 0.251                                   |
| 4   | 106.89                                | D4S2986     | 865.222       | 0.42                        | 0.216                              | 0.325                                   |
| 4   | 110.138                               | D4S1572     | 868.47        | 0.677                       | 0.632                              | 0.494                                   |
| 4   | 116.94                                | D4S2945     | 875.272       | 0.49                        | 0.324                              | 0.398                                   |
| 4   | 117.484                               | D4S406      | 875.816       | 0.504                       | 0.346                              | 0.413                                   |
| 4   | 121.13                                | D4S1611     | 879.462       | 0.253                       | 0.103                              | 0.139                                   |
| 4   | 125.559                               | D4S427      | 883.891       | 0.248                       | 0.297                              | 0.411                                   |
| 4   | 129.752                               | D4S1615     | 888.084       | 0.215                       | 0.322                              | 0.578                                   |
| 4   | 134.67                                | D4S1575     | 893.002       | 0.273                       | 0.455                              | 1.043                                   |
| 4   | 139.994                               | D4S1579     | 898.326       | 0.286                       | 0.677                              | 0.896                                   |
| 4   | 142.051                               | D4S424      | 900.383       | 0.349                       | 0.805                              | 1.015                                   |
| 4   | 144.419                               | D4S1586     | 902.751       | 0.692                       | 1.113                              | 1.244                                   |
| 4   | 148.056                               | D4S2962     | 906.388       | 1.06                        | 1.025                              | 0.961                                   |

| Chr | centiMorgan Position<br>On Decode Map | Marker Name | Cumulative cM | LOD Recurrent<br>Depression | LOD Severe Recurrent<br>Depression | LOD Very Severe<br>Recurrent Depression |
|-----|---------------------------------------|-------------|---------------|-----------------------------|------------------------------------|-----------------------------------------|
| 4   | 151.163                               | D4S2934     | 909.495       | 0.648                       | 0.349                              | 0.476                                   |
| 4   | 153.058                               | D4S3021     | 911.39        | 0.469                       | 0.079                              | 0.186                                   |
| 4   | 157.382                               | D4S2918     | 915.714       | 0.521                       | 0.037                              | 0.09                                    |
| 4   | 157.383                               | D4S2980     | 915.715       | 0.521                       | 0.037                              | 0.09                                    |
| 4   | 159.326                               | D4S3046     | 917.658       | 0.465                       | 0.066                              | 0.089                                   |
| 4   | 164.316                               | D4S2952     | 922.648       | 0.468                       | 0.11                               | 0.209                                   |
| 4   | 169.551                               | D4S2910     | 927.883       | 0.595                       | 0.204                              | 0.282                                   |
| 4   | 173.748                               | D4S1539     | 932.08        | 0.314                       | 0.151                              | 0.495                                   |
| 4   | 174.553                               | D4S3030     | 932.885       | 0.324                       | 0.15                               | 0.475                                   |
| 4   | 177.034                               | D4S415      | 935.366       | 0.306                       | 0.285                              | 0.623                                   |
| 4   | 180.201                               | D4S2417     | 938.533       | 0.204                       | 0.196                              | 0.548                                   |
| 4   | 184.143                               | D4S1607     | 942.475       | 0.013                       | 0.036                              | 0.207                                   |
| 4   | 187.268                               | D4S3015     | 945.6         | 0.055                       | 0.128                              | 0.283                                   |
| 4   | 189.524                               | D4S3041     | 947.856       | -0.001                      | 0.035                              | 0.187                                   |
| 4   | 193.499                               | D4S408      | 951.831       | -0.005                      | 0.077                              | 0.316                                   |
| 4   | 201.87                                | DG4S26      | 960.202       | -0.048                      | 0.029                              | 0.404                                   |
| 4   | 204.693                               | D4S3051     | 963.025       | -0.042                      | 0.057                              | 0.274                                   |
| 4   | 209.268                               | D4S2930     | 967.6         | -0.102                      | 0.104                              | 0.135                                   |
| 5   | 1.212                                 | D5S1981     | 968.812       | -0.151                      | -0.018                             | -0.059                                  |
| 5   | 9.355                                 | D5S417      | 976.955       | -0.277                      | -0.007                             | -0.069                                  |
| 5   | 11.871                                | D5S2088     | 979.471       | -0.091                      | 0.007                              | -0.057                                  |
| 5   | 13.117                                | D5S406      | 980.717       | -0.148                      | -0.001                             | -0.05                                   |
| 5   | 16.644                                | D5S2054     | 984.244       | -0.233                      | -0.022                             | 0                                       |
| 5   | 18.108                                | D5S635      | 985.708       | -0.248                      | -0.021                             | 0.005                                   |
| 5   | 22.949                                | D5S1957     | 990.549       | -0.623                      | -0.101                             | 0.009                                   |
| 5   | 27.247                                | D5S1486     | 994.847       | -0.209                      | -0.047                             | 0.031                                   |
| 5   | 33.491                                | D5S2081     | 1001.091      | 0                           | -0.001                             | 0.194                                   |
| 5   | 36.026                                | D5S1954     | 1003.626      | 0.004                       | 0.001                              | 0.249                                   |
| 5   | 39.436                                | D5S2096     | 1007.036      | 0.005                       | -0.003                             | 0.394                                   |
| 5   | 42.23                                 | D5S2031     | 1009.83       | 0.252                       | 0.058                              | 0.639                                   |
| 5   | 47.813                                | D5S2848     | 1015.413      | 0.872                       | 0.341                              | 0.617                                   |
| 5   | 50.056                                | D5S661      | 1017.656      | 0.912                       | 0.376                              | 0.63                                    |
| 5   | 53.234                                | D5S1986     | 1020.834      | 0.731                       | 0.5                                | 0.994                                   |
| 5   | 56.711                                | D5S674      | 1024.311      | 0.689                       | 0.371                              | 0.73                                    |
| 5   | 58.504                                | D5S426      | 1026.104      | 0.603                       | 0.327                              | 0.956                                   |
| 5   | 61.33                                 | D5S2021     | 1028.93       | 0.667                       | 0.286                              | 0.902                                   |
| 5   | 66.571                                | D5S418      | 1034.171      | 0.53                        | 0.148                              | 0.452                                   |
| 5   | 67.291                                | D5S430      | 1034.891      | 0.502                       | 0.126                              | 0.443                                   |



| Chr | centiMorgan Position<br>On Decode Map | Marker Name | Cumulative cM | LOD Recurrent<br>Depression | LOD Severe Recurrent<br>Depression | LOD Very Severe<br>Recurrent Depression |
|-----|---------------------------------------|-------------|---------------|-----------------------------|------------------------------------|-----------------------------------------|
| 5   | 71.143                                | D5S628      | 1038.743      | 0.318                       | 0.054                              | 0.514                                   |
| 5   | 75.011                                | D5S2102     | 1042.611      | 0.617                       | 0.103                              | 0.465                                   |
| 5   | 79.196                                | D5S427      | 1046.796      | 0.506                       | 0.068                              | 0.54                                    |
| 5   | 80.82                                 | D5S2072     | 1048.42       | 0.337                       | 0.032                              | 0.418                                   |
| 5   | 85.12                                 | D5S1999     | 1052.72       | 0.53                        | 0.026                              | 0.311                                   |
| 5   | 85.377                                | D5S2851     | 1052.977      | 0.531                       | 0.028                              | 0.322                                   |
| 5   | 90.541                                | D5S2003     | 1058.141      | 0.284                       | 0.01                               | 0.219                                   |
| 5   | 93.23                                 | D5S424      | 1060.83       | 0.298                       | -0.001                             | 0.082                                   |
| 5   | 98.143                                | D5S1397     | 1065.743      | 0.196                       | -0.005                             | 0.02                                    |
| 5   | 101.54                                | D5S641      | 1069.14       | 0.084                       | -0.054                             | 0.001                                   |
| 5   | 104.446                               | D5S428      | 1072.046      | -0.003                      | -0.154                             | -0.052                                  |
| 5   | 106.879                               | D5S1725     | 1074.479      | -0.085                      | -0.198                             | -0.202                                  |
| 5   | 108.317                               | D5S2498     | 1075.917      | -0.137                      | -0.288                             | -0.427                                  |
| 5   | 113.021                               | D5S1503     | 1080.621      | -0.26                       | -0.283                             | -0.369                                  |
| 5   | 114.893                               | D5S409      | 1082.493      | -0.268                      | -0.288                             | -0.337                                  |
| 5   | 119.416                               | D5S2501     | 1087.016      | 0.031                       | -0.012                             | -0.195                                  |
| 5   | 120.952                               | D5S2027     | 1088.552      | 0.111                       | 0                                  | -0.144                                  |
| 5   | 122.492                               | D5S2065     | 1090.092      | 0.134                       | 0.005                              | -0.138                                  |
| 5   | 122.574                               | D5S1720     | 1090.174      | 0.137                       | 0.005                              | -0.139                                  |
| 5   | 127.059                               | D5S404      | 1094.659      | 0.263                       | 0.021                              | -0.123                                  |
| 5   | 134.522                               | D5S490      | 1102.122      | -0.006                      | -0.091                             | -0.313                                  |
| 5   | 138.746                               | D5S2053     | 1106.346      | -0.099                      | -0.122                             | -0.583                                  |
| 5   | 139.988                               | D5S2115     | 1107.588      | -0.05                       | -0.044                             | -0.496                                  |
| 5   | 143.92                                | D5S2508     | 1111.52       | -0.031                      | -0.006                             | -0.395                                  |
| 5   | 145.351                               | D5S2017     | 1112.951      | -0.019                      | -0.003                             | -0.471                                  |
| 5   | 150.78                                | D5S436      | 1118.38       | -0.007                      | 0                                  | -0.454                                  |
| 5   | 153.72                                | D5S2090     | 1121.32       | -0.014                      | 0.001                              | -0.29                                   |
| 5   | 159.098                               | D5S2014     | 1126.698      | -0.052                      | -0.041                             | -0.309                                  |
| 5   | 162.446                               | D5S410      | 1130.046      | -0.047                      | 0                                  | -0.066                                  |
| 5   | 165.956                               | D5S2049     | 1133.556      | -0.012                      | 0.015                              | -0.129                                  |
| 5   | 171.447                               | D5S2066     | 1139.047      | 0                           | 0.137                              | -0.442                                  |
| 5   | 173.9                                 | D5S2040     | 1141.5        | 0.066                       | 0.192                              | -0.459                                  |
| 5   | 176.971                               | D5S2050     | 1144.571      | 0.103                       | 0.175                              | -0.415                                  |
| 5   | 181.337                               | D5S400      | 1148.937      | 0.149                       | 0.028                              | -0.628                                  |
| 5   | 182.329                               | D5S2075     | 1149.929      | 0.158                       | 0.037                              | -0.583                                  |
| 5   | 184.164                               | D5S1973     | 1151.764      | 0.097                       | 0.028                              | -0.56                                   |
| 5   | 189.288                               | D5S1960     | 1156.888      | 0.01                        | 0.002                              | -0.42                                   |
| 5   | 194.398                               | D5S2069     | 1161.998      | 0.122                       | 0.031                              | -0.77                                   |

| Chr | centiMorgan Position<br>On Decode Map | Marker Name | Cumulative cM | LOD Recurrent<br>Depression | LOD Severe Recurrent<br>Depression | LOD Very Severe<br>Recurrent Depression |
|-----|---------------------------------------|-------------|---------------|-----------------------------|------------------------------------|-----------------------------------------|
| 5   | 196.439                               | D5S2058     | 1164.039      | 0.261                       | 0.047                              | -0.664                                  |
| 5   | 197.374                               | D5S498      | 1164.974      | 0.37                        | 0.092                              | -0.55                                   |
| 5   | 203.456                               | D5S469      | 1171.056      | 0.114                       | 0.024                              | -0.362                                  |
| 5   | 205.424                               | D5S2030     | 1173.024      | 0.162                       | 0.07                               | -0.173                                  |
| 5   | 210.411                               | D5S408      | 1178.011      | 0.368                       | 0.143                              | -0.017                                  |
| 5   | 211.064                               | D5S2006     | 1178.664      | 0.393                       | 0.154                              | -0.013                                  |
| 6   | 5.657                                 | D6S244      | 1184.321      | -0.224                      | -0.415                             | -0.391                                  |
| 6   | 12.178                                | D6S1617     | 1190.842      | -0.097                      | -0.236                             | -0.148                                  |
| 6   | 16.206                                | D6S1574     | 1194.87       | -0.04                       | -0.069                             | -0.238                                  |
| 6   | 19.816                                | D6S1640     | 1198.48       | -0.131                      | -0.107                             | -0.297                                  |
| 6   | 21.603                                | D6S309      | 1200.267      | -0.15                       | -0.13                              | -0.185                                  |
| 6   | 24.914                                | D6S470      | 1203.578      | -0.042                      | -0.188                             | -0.226                                  |
| 6   | 30.35                                 | D6S1279     | 1209.014      | 0                           | -0.144                             | 0.031                                   |
| 6   | 31.851                                | D6S1721     | 1210.515      | 0.005                       | -0.181                             | 0.029                                   |
| 6   | 36.34                                 | D6S289      | 1215.004      | 0.007                       | -0.067                             | 0.041                                   |
| 6   | 40.175                                | D6S1567     | 1218.839      | 0.016                       | -0.008                             | 0.194                                   |
| 6   | 44.681                                | D6S422      | 1223.345      | 0.001                       | -0.032                             | 0.126                                   |
| 6   | 46.737                                | D6S1588     | 1225.401      | -0.001                      | -0.085                             | 0.057                                   |
| 6   | 48.373                                | D6S1660     | 1227.037      | 0.012                       | -0.088                             | 0.043                                   |
| 6   | 51.181                                | D6S1571     | 1229.845      | -0.027                      | -0.381                             | 0.003                                   |
| 6   | 53.751                                | D6S273      | 1232.415      | -0.075                      | -0.613                             | -0.01                                   |
| 6   | 57.511                                | D6S291      | 1236.175      | -0.036                      | -0.544                             | -0.054                                  |
| 6   | 57.941                                | D6S1576     | 1236.605      | -0.063                      | -0.674                             | -0.1                                    |
| 6   | 63.694                                | D6S1575     | 1242.358      | -0.092                      | -0.643                             | -0.194                                  |
| 6   | 63.989                                | D6S1549     | 1242.653      | -0.084                      | -0.667                             | -0.208                                  |
| 6   | 68.355                                | D6S282      | 1247.019      | -0.022                      | -0.762                             | -0.422                                  |
| 6   | 72.595                                | D6S459      | 1251.259      | 0                           | -0.433                             | -0.407                                  |
| 6   | 74.581                                | D6S452      | 1253.245      | 0.001                       | -0.322                             | -0.259                                  |
| 6   | 76.516                                | D6S272      | 1255.18       | 0                           | -0.239                             | -0.158                                  |
| 6   | 80.398                                | D6S1960     | 1259.062      | -0.128                      | -0.474                             | -0.747                                  |
| 6   | 82.215                                | D6S257      | 1260.879      | -0.176                      | -0.453                             | -0.909                                  |
| 6   | 87.059                                | D6S1557     | 1265.723      | -0.042                      | -0.278                             | -0.787                                  |
| 6   | 91.94                                 | D6S1031     | 1270.604      | 0.02                        | -0.004                             | -0.43                                   |
| 6   | 93.396                                | D6S460      | 1272.06       | 0.067                       | 0                                  | -0.339                                  |
| 6   | 97.333                                | D6S1644     | 1275.997      | 0.025                       | 0                                  | -0.282                                  |
| 6   | 102.773                               | D6S458      | 1281.437      | 0.046                       | 0.044                              | -0.272                                  |
| 6   | 109.245                               | D6S1709     | 1287.909      | 0.012                       | 0.042                              | -0.135                                  |
| 6   | 115.025                               | D6S268      | 1293.689      | -0.005                      | -0.004                             | -0.017                                  |

| Chr | centiMorgan Position<br>On Decode Map | Marker Name | Cumulative cM | LOD Recurrent<br>Depression | LOD Severe Recurrent<br>Depression | LOD Very Severe<br>Recurrent Depression |
|-----|---------------------------------------|-------------|---------------|-----------------------------|------------------------------------|-----------------------------------------|
| 6   | 119.653                               | D6S416      | 1298.317      | 0.002                       | -0.065                             | -0.012                                  |
| 6   | 120.964                               | D6S1603     | 1299.628      | 0.004                       | -0.071                             | -0.019                                  |
| 6   | 123.794                               | D6S1712     | 1302.458      | 0.021                       | -0.197                             | -0.096                                  |
| 6   | 129.272                               | D6S408      | 1307.936      | 0.035                       | -0.258                             | -0.313                                  |
| 6   | 131.678                               | D6S407      | 1310.342      | 0.018                       | -0.214                             | -0.36                                   |
| 6   | 134.761                               | D6S1656     | 1313.425      | 0.035                       | -0.151                             | -0.216                                  |
| 6   | 138.783                               | D6S270      | 1317.447      | 0.024                       | -0.207                             | -0.106                                  |
| 6   | 142.713                               | D6S1009     | 1321.377      | 0.002                       | -0.295                             | -0.084                                  |
| 6   | 146.769                               | D6S1569     | 1325.433      | 0.002                       | -0.165                             | -0.201                                  |
| 6   | 149.86                                | D6S958      | 1328.524      | -0.012                      | -0.481                             | -0.572                                  |
| 6   | 154.786                               | D6S1637     | 1333.45       | 0.1                         | -0.084                             | -0.227                                  |
| 6   | 158.293                               | D6S1687     | 1336.957      | 0.374                       | -0.011                             | -0.099                                  |
| 6   | 165.048                               | D6S441      | 1343.712      | 0.973                       | 0.084                              | 0.055                                   |
| 6   | 170.827                               | D6S419      | 1349.491      | 0.772                       | 0.226                              | 0.206                                   |
| 6   | 174.456                               | D6S1581     | 1353.12       | 0.925                       | 0.549                              | 0.563                                   |
| 6   | 176.923                               | D6S305      | 1355.587      | 1.307                       | 0.613                              | 0.509                                   |
| 6   | 179.13                                | D6S1599     | 1357.794      | 1.151                       | 0.635                              | 0.568                                   |
| 6   | 180.806                               | D6S1277     | 1359.47       | 0.592                       | 0.221                              | 0.317                                   |
| 6   | 183.345                               | D6S1719     | 1362.009      | 0.681                       | 0.171                              | 0.093                                   |
| 6   | 185.783                               | D6S264      | 1364.447      | 0.658                       | 0.149                              | 0.015                                   |
| 6   | 190.173                               | D6S503      | 1368.837      | 0.641                       | 0.216                              | 0.019                                   |
| 6   | 193.435                               | D6S281      | 1372.099      | 0.352                       | 0.2                                | 0.033                                   |
| 6   | 194.224                               | D6S446      | 1372.888      | 0.289                       | 0.15                               | 0.026                                   |
| 7   | 3.71                                  | D7S2474     | 1376.598      | 0.155                       | 0.498                              | 0.336                                   |
| 7   | 7.702                                 | D7S531      | 1380.59       | 0.24                        | 0.498                              | 0.277                                   |
| 7   | 12.205                                | D7S2201     | 1385.093      | 0.626                       | 0.969                              | 1.113                                   |
| 7   | 17.854                                | D7S641      | 1390.742      | 0.721                       | 1.317                              | 1.711                                   |
| 7   | 23.238                                | D7S513      | 1396.126      | 0.628                       | 1.5                                | 1.905                                   |
| 7   | 26.724                                | D7S664      | 1399.612      | 0.492                       | 1.243                              | 1.653                                   |
| 7   | 29.624                                | D7S2557     | 1402.512      | 0.659                       | 0.935                              | 1.029                                   |
| 7   | 34.178                                | D7S2495     | 1407.066      | 0.726                       | 0.678                              | 0.57                                    |
| 7   | 36.404                                | D7S1802     | 1409.292      | 0.344                       | 0.325                              | 0.24                                    |
| 7   | 37.926                                | D7S493      | 1410.814      | 0.286                       | 0.327                              | 0.125                                   |
| 7   | 38.947                                | D7S1795     | 1411.835      | 0.224                       | 0.271                              | 0.06                                    |
| 7   | 40.505                                | D7S2463     | 1413.393      | 0.174                       | 0.227                              | 0.047                                   |
| 7   | 45.356                                | D7S516      | 1418.244      | 0.241                       | 0.21                               | 0                                       |
| 7   | 53.389                                | D7S2252     | 1426.277      | 0.139                       | 0.056                              | -0.231                                  |
| 7   | 55.899                                | D7S2250     | 1428.787      | 0.029                       | 0.005                              | -0.279                                  |

| Chr | centiMorgan Position<br>On Decode Map | Marker Name | Cumulative cM | LOD Recurrent<br>Depression | LOD Severe Recurrent<br>Depression | LOD Very Severe<br>Recurrent Depression |
|-----|---------------------------------------|-------------|---------------|-----------------------------|------------------------------------|-----------------------------------------|
| 7   | 60.57                                 | D7S2846     | 1433.458      | -0.026                      | 0.006                              | -0.089                                  |
| 7   | 61.944                                | D7S510      | 1434.832      | -0.009                      | 0.023                              | -0.039                                  |
| 7   | 63.445                                | D7S2541     | 1436.333      | 0.001                       | 0.106                              | 0                                       |
| 7   | 64.932                                | D7S691      | 1437.82       | 0.006                       | 0.102                              | -0.001                                  |
| 7   | 70.244                                | D7S519      | 1443.132      | -0.006                      | 0                                  | -0.131                                  |
| 7   | 71.695                                | D7S2506     | 1444.583      | -0.008                      | -0.004                             | -0.162                                  |
| 7   | 74.843                                | D7S2422     | 1447.731      | -0.023                      | 0.001                              | -0.058                                  |
| 7   | 76.795                                | D7S2451     | 1449.683      | -0.026                      | 0.008                              | -0.049                                  |
| 7   | 77.337                                | D7S2475     | 1450.225      | -0.036                      | 0.008                              | -0.049                                  |
| 7   | 79.12                                 | D7S499      | 1452.008      | -0.082                      | 0.029                              | -0.082                                  |
| 7   | 80.225                                | D7S2429     | 1453.113      | -0.1                        | 0.025                              | -0.145                                  |
| 7   | 80.864                                | D7S502      | 1453.752      | -0.117                      | 0.014                              | -0.249                                  |
| 7   | 83.713                                | D7S2500     | 1456.601      | -0.025                      | 0.033                              | -0.279                                  |
| 7   | 86.425                                | D7S672      | 1459.313      | 0.011                       | 0.093                              | -0.257                                  |
| 7   | 88.745                                | D7S1870     | 1461.633      | 0.04                        | 0.142                              | -0.054                                  |
| 7   | 91.309                                | D7S669      | 1464.197      | 0.194                       | 0.22                               | -0.019                                  |
| 7   | 94.466                                | D7S2443     | 1467.354      | 0.161                       | 0.069                              | -0.052                                  |
| 7   | 95.116                                | D7S660      | 1468.004      | 0.132                       | 0.049                              | -0.034                                  |
| 7   | 100.2                                 | D7S1528     | 1473.088      | 0.203                       | 0.018                              | -0.066                                  |
| 7   | 100.344                               | D7S2485     | 1473.232      | 0.197                       | 0.019                              | -0.066                                  |
| 7   | 102.009                               | D7S630      | 1474.897      | 0.235                       | 0.022                              | -0.034                                  |
| 7   | 104.927                               | D7S2409     | 1477.815      | 0.179                       | 0.004                              | -0.029                                  |
| 7   | 105.585                               | D7S657      | 1478.473      | 0.218                       | 0.015                              | -0.019                                  |
| 7   | 108.202                               | D7S2431     | 1481.09       | 0.299                       | 0.043                              | -0.067                                  |
| 7   | 109.67                                | D7S554      | 1482.558      | 0.235                       | 0.034                              | -0.075                                  |
| 7   | 114.476                               | D7S2509     | 1487.364      | 0.128                       | 0.005                              | -0.125                                  |
| 7   | 120.049                               | D7S2459     | 1492.937      | 0.372                       | 0.117                              | 0.044                                   |
| 7   | 122.151                               | D7S2418     | 1495.039      | 0.862                       | 0.312                              | 0.094                                   |
| 7   | 124.818                               | D7S486      | 1497.706      | 1.215                       | 0.424                              | 0.077                                   |
| 7   | 124.819                               | D7S522      | 1497.707      | 1.215                       | 0.424                              | 0.077                                   |
| 7   | 129.446                               | D7S648      | 1502.334      | 0.987                       | 0.459                              | 0.16                                    |
| 7   | 131.548                               | D7S514      | 1504.436      | 0.912                       | 0.459                              | 0.167                                   |
| 7   | 133.201                               | D7S530      | 1506.089      | 0.963                       | 0.584                              | 0.255                                   |
| 7   | 136.4                                 | D7S649      | 1509.288      | 1.005                       | 0.56                               | 0.309                                   |
| 7   | 141.74                                | D7S2533     | 1514.628      | 0.853                       | 0.557                              | 0.089                                   |
| 7   | 145.559                               | D7S509      | 1518.447      | 0.692                       | 0.498                              | 0.071                                   |
| 7   | 149.79                                | D7S684      | 1522.678      | 0.337                       | 0.211                              | 0                                       |
| 7   | 152.076                               | D7S1824     | 1524.964      | 0.533                       | 0.596                              | 0.031                                   |

| Chr | centiMorgan Position<br>On Decode Map | Marker Name | Cumulative cM | LOD Recurrent<br>Depression | LOD Severe Recurrent<br>Depression | LOD Very Severe<br>Recurrent Depression |
|-----|---------------------------------------|-------------|---------------|-----------------------------|------------------------------------|-----------------------------------------|
| 7   | 153.382                               | D7S2513     | 1526.27       | 0.338                       | 0.511                              | 0.016                                   |
| 7   | 155.037                               | D7S661      | 1527.925      | 0.195                       | 0.301                              | 0.003                                   |
| 7   | 155.315                               | D7S676      | 1528.203      | 0.179                       | 0.309                              | 0.01                                    |
| 7   | 157.645                               | D7S2511     | 1530.533      | 0.032                       | 0.134                              | 0.028                                   |
| 7   | 165.55                                | D7S1805     | 1538.438      | -0.059                      | 0                                  | -0.204                                  |
| 7   | 166.326                               | D7S642      | 1539.214      | -0.118                      | -0.005                             | -0.173                                  |
| 7   | 170.597                               | D7S483      | 1543.485      | -0.026                      | 0.004                              | -0.026                                  |
| 7   | 175.859                               | D7S2462     | 1548.747      | 0.001                       | 0.003                              | 0.005                                   |
| 7   | 179.624                               | D7S2447     | 1552.512      | 0.002                       | 0.014                              | 0.033                                   |
| 7   | 187.719                               | D7S559      | 1560.607      | -0.004                      | 0.089                              | 0.222                                   |
| 7   | 192.273                               | D7S2423     | 1565.161      | 0.031                       | 0.1                                | 0.117                                   |
| 8   | 3.538                                 | D8S264      | 1568.699      | -0.012                      | -0.004                             | -0.163                                  |
| 8   | 6.889                                 | D8S1824     | 1572.05       | -0.024                      | -0.004                             | -0.299                                  |
| 8   | 9.788                                 | D8S518      | 1574.949      | 0                           | 0.001                              | -0.315                                  |
| 8   | 15.212                                | D8S1742     | 1580.373      | -0.019                      | 0                                  | -0.187                                  |
| 8   | 16.906                                | D8S1819     | 1582.067      | -0.032                      | -0.003                             | -0.297                                  |
| 8   | 19.634                                | D8S1759     | 1584.795      | -0.014                      | -0.004                             | -0.331                                  |
| 8   | 21.475                                | D8S520      | 1586.636      | -0.008                      | 0.004                              | -0.403                                  |
| 8   | 22.502                                | D8S516      | 1587.663      | -0.001                      | 0.008                              | -0.37                                   |
| 8   | 22.943                                | D8S1825     | 1588.104      | 0                           | 0.006                              | -0.339                                  |
| 8   | 24.4                                  | D8S552      | 1589.561      | 0                           | -0.003                             | -0.589                                  |
| 8   | 26.087                                | D8S1790     | 1591.248      | -0.002                      | -0.05                              | -0.717                                  |
| 8   | 27.058                                | D8S1827     | 1592.219      | -0.029                      | -0.133                             | -0.747                                  |
| 8   | 27.172                                | D8S549      | 1592.333      | -0.034                      | -0.147                             | -0.762                                  |
| 8   | 36.656                                | D8S258      | 1601.817      | -0.03                       | -0.088                             | -0.459                                  |
| 8   | 38.668                                | D8S1116     | 1603.829      | -0.027                      | -0.037                             | -0.456                                  |
| 8   | 42.099                                | D8S1734     | 1607.26       | -0.029                      | -0.018                             | -0.659                                  |
| 8   | 47.961                                | D8S585      | 1613.122      | 0.002                       | 0.096                              | -0.418                                  |
| 8   | 49.166                                | D8S1820     | 1614.327      | 0.02                        | 0.167                              | -0.276                                  |
| 8   | 55.976                                | D8S505      | 1621.137      | 0.101                       | 0.18                               | -0.216                                  |
| 8   | 58.623                                | D8S1791     | 1623.784      | 0.204                       | 0.4                                | -0.031                                  |
| 8   | 61.589                                | D8S532      | 1626.75       | 0.203                       | 0.394                              | -0.016                                  |
| 8   | 63.93                                 | D8S531      | 1629.091      | 0.166                       | 0.219                              | -0.062                                  |
| 8   | 69.341                                | D8S1737     | 1634.502      | 0.038                       | 0.219                              | -0.004                                  |
| 8   | 69.412                                | D8S509      | 1634.573      | 0.037                       | 0.217                              | -0.003                                  |
| 8   | 73.884                                | D8S1763     | 1639.045      | 0.005                       | 0.059                              | -0.073                                  |
| 8   | 75.632                                | D8S260      | 1640.793      | 0.012                       | 0.034                              | -0.111                                  |
| 8   | 78.059                                | D8S512      | 1643.22       | 0.001                       | 0.003                              | -0.123                                  |

| Chr | centiMorgan Position<br>On Decode Map | Marker Name | Cumulative cM | LOD Recurrent<br>Depression | LOD Severe Recurrent<br>Depression | LOD Very Severe<br>Recurrent Depression |
|-----|---------------------------------------|-------------|---------------|-----------------------------|------------------------------------|-----------------------------------------|
| 8   | 81.877                                | D8S543      | 1647.038      | -0.007                      | -0.064                             | -0.068                                  |
| 8   | 86.515                                | D8S279      | 1651.676      | 0.025                       | -0.146                             | -0.006                                  |
| 8   | 92.177                                | D8S1705     | 1657.338      | 0.348                       | 0.006                              | 0.003                                   |
| 8   | 97.461                                | D8S1707     | 1662.622      | 0.256                       | 0.007                              | -0.031                                  |
| 8   | 97.796                                | D8S273      | 1662.957      | 0.252                       | 0.007                              | -0.038                                  |
| 8   | 99.732                                | D8S270      | 1664.893      | 0.196                       | 0.016                              | -0.021                                  |
| 8   | 102.988                               | D8S1699     | 1668.149      | 0.264                       | 0.042                              | 0.026                                   |
| 8   | 106.891                               | D8S1778     | 1672.052      | 0.383                       | 0.15                               | 0.083                                   |
| 8   | 108.054                               | D8S1762     | 1673.215      | 0.347                       | 0.14                               | 0.06                                    |
| 8   | 110.624                               | D8S521      | 1675.785      | 0.342                       | 0.239                              | 0.098                                   |
| 8   | 115.27                                | D8S1784     | 1680.431      | 0.399                       | 0.245                              | 0.095                                   |
| 8   | 115.987                               | D8S1132     | 1681.148      | 0.409                       | 0.236                              | 0.086                                   |
| 8   | 118.703                               | D8S1470     | 1683.864      | 0.221                       | 0.085                              | 0.073                                   |
| 8   | 119.262                               | D8S1779     | 1684.423      | 0.187                       | 0.03                               | 0.038                                   |
| 8   | 119.655                               | D8S281      | 1684.816      | 0.185                       | 0.025                              | 0.032                                   |
| 8   | 123.3                                 | D8S1823     | 1688.461      | 0.348                       | 0.139                              | 0.049                                   |
| 8   | 127.609                               | D8S514      | 1692.77       | 0.378                       | 0.091                              | 0.016                                   |
| 8   | 131.797                               | D8S1799     | 1696.958      | 0.305                       | 0.019                              | 0.053                                   |
| 8   | 132.391                               | D8S1461     | 1697.552      | 0.325                       | 0.01                               | 0.045                                   |
| 8   | 135.126                               | D8S1793     | 1700.287      | 0.382                       | 0                                  | 0.008                                   |
| 8   | 141.475                               | D8S263      | 1706.636      | 0.121                       | -0.091                             | -0.025                                  |
| 8   | 143.224                               | D8S284      | 1708.385      | 0.172                       | -0.064                             | -0.017                                  |
| 8   | 148.757                               | D8S256      | 1713.918      | 0.172                       | -0.051                             | -0.001                                  |
| 8   | 150.111                               | D8S1746     | 1715.272      | 0.266                       | -0.039                             | 0                                       |
| 8   | 152.339                               | D8S1783     | 1717.5        | 0.258                       | -0.007                             | 0.001                                   |
| 8   | 153.607                               | D8S274      | 1718.768      | 0.389                       | 0.006                              | 0.03                                    |
| 8   | 160.009                               | D8S1743     | 1725.17       | 0.152                       | -0.031                             | 0.001                                   |
| 9   | 0.001                                 | D9S1779     | 1725.171      | 0.091                       | 0.094                              | 0.113                                   |
| 9   | 0.26                                  | D9S1858     | 1725.43       | 0.087                       | 0.097                              | 0.119                                   |
| 9   | 7.197                                 | D9S54       | 1732.367      | 0.162                       | 0.358                              | 0.016                                   |
| 9   | 8.716                                 | D9S288      | 1733.886      | 0.256                       | 0.447                              | 0.003                                   |
| 9   | 11.931                                | D9S1686     | 1737.101      | 0.306                       | 0.361                              | 0.064                                   |
| 9   | 12.758                                | D9S1810     | 1737.928      | 0.336                       | 0.361                              | 0.092                                   |
| 9   | 18.529                                | D9S286      | 1743.699      | 0.694                       | 0.4                                | 0.113                                   |
| 9   | 28.239                                | D9S1808     | 1753.409      | 0.127                       | -0.003                             | 0                                       |
| 9   | 32.645                                | D9S235      | 1757.815      | 0.003                       | -0.06                              | -0.031                                  |
| 9   | 37.621                                | D9S157      | 1762.791      | 0.045                       | -0.009                             | 0                                       |
| 9   | 41.71                                 | D9S162      | 1766.88       | 0.099                       | -0.001                             | 0.009                                   |

| Chr | centiMorgan Position<br>On Decode Map | Marker Name | Cumulative cM | LOD Recurrent<br>Depression | LOD Severe Recurrent<br>Depression | LOD Very Severe<br>Recurrent Depression |
|-----|---------------------------------------|-------------|---------------|-----------------------------|------------------------------------|-----------------------------------------|
| 9   | 44.971                                | D9S1870     | 1770.141      | 0.191                       | 0.001                              | 0.014                                   |
| 9   | 47.163                                | D9S171      | 1772.333      | 0.312                       | 0                                  | 0.035                                   |
| 9   | 49.852                                | D9S259      | 1775.022      | 0.445                       | 0                                  | 0.023                                   |
| 9   | 55.17                                 | D9S1853     | 1780.34       | 0.472                       | -0.057                             | 0.011                                   |
| 9   | 55.302                                | D9S2149     | 1780.472      | 0.479                       | -0.056                             | 0.01                                    |
| 9   | 58.233                                | D9S1817     | 1783.403      | 0.264                       | -0.006                             | 0.021                                   |
| 9   | 61.011                                | D9S772      | 1786.181      | 0.233                       | 0.013                              | 0.067                                   |
| 9   | 67.339                                | D9S1777     | 1792.509      | 0.036                       | 0.004                              | 0.055                                   |
| 9   | 70.422                                | D9S1876     | 1795.592      | -0.002                      | -0.019                             | 0                                       |
| 9   | 72.803                                | D9S175      | 1797.973      | -0.035                      | -0.046                             | 0.009                                   |
| 9   | 76.609                                | D9S1674     | 1801.779      | -0.013                      | -0.168                             | 0.035                                   |
| 9   | 79.874                                | D9S1843     | 1805.044      | -0.012                      | -0.292                             | -0.002                                  |
| 9   | 83.036                                | D9S1785     | 1808.206      | -0.012                      | -0.307                             | -0.014                                  |
| 9   | 89.23                                 | D9S307      | 1814.4        | -0.007                      | -0.163                             | -0.014                                  |
| 9   | 94.865                                | D9S253      | 1820.035      | -0.034                      | -0.294                             | -0.06                                   |
| 9   | 95.9                                  | D9S283      | 1821.07       | -0.022                      | -0.269                             | -0.075                                  |
| 9   | 98.124                                | D9S1781     | 1823.294      | -0.011                      | -0.186                             | -0.116                                  |
| 9   | 101.542                               | D9S287      | 1826.712      | -0.076                      | -0.169                             | -0.17                                   |
| 9   | 106.996                               | D9S1690     | 1832.166      | -0.267                      | -0.043                             | -0.342                                  |
| 9   | 111.558                               | D9S172      | 1836.728      | -0.249                      | -0.06                              | -0.296                                  |
| 9   | 112.778                               | D9S1162     | 1837.948      | -0.28                       | -0.085                             | -0.237                                  |
| 9   | 114.649                               | D9S261      | 1839.819      | -0.298                      | -0.1                               | -0.155                                  |
| 9   | 117.445                               | D9S1675     | 1842.615      | -0.254                      | -0.197                             | -0.095                                  |
| 9   | 117.673                               | D9S1828     | 1842.843      | -0.262                      | -0.203                             | -0.096                                  |
| 9   | 123.555                               | D9S1824     | 1848.725      | -0.57                       | -0.531                             | -0.278                                  |
| 9   | 124.821                               | D9S1776     | 1849.991      | -0.615                      | -0.634                             | -0.401                                  |
| 9   | 127.719                               | D9S934      | 1852.889      | -1.396                      | -1.14                              | -0.544                                  |
| 9   | 132.086                               | D9S1682     | 1857.256      | -1.73                       | -1.219                             | -0.418                                  |
| 9   | 136.348                               | D9S1825     | 1861.518      | -1.066                      | -0.911                             | -0.119                                  |
| 9   | 137.485                               | D9S1821     | 1862.655      | -0.946                      | -0.941                             | -0.107                                  |
| 9   | 139.866                               | D9S290      | 1865.036      | -1.042                      | -0.872                             | -0.112                                  |
| 9   | 142.116                               | D9S1795     | 1867.286      | -1.274                      | -1.021                             | -0.195                                  |
| 9   | 143.914                               | D9S1863     | 1869.084      | -1.034                      | -0.806                             | -0.224                                  |
| 9   | 149.357                               | D9S1830     | 1874.527      | -0.38                       | -0.399                             | -0.121                                  |
| 9   | 150.424                               | D9S1793     | 1875.594      | -0.305                      | -0.301                             | -0.077                                  |
| 9   | 154.264                               | D9S1818     | 1879.434      | -0.081                      | -0.087                             | 0                                       |
| 9   | 162.103                               | D9S1826     | 1887.273      | -0.458                      | -0.187                             | 0                                       |
| 9   | 164.102                               | D9S1838     | 1889.272      | -0.902                      | -0.44                              | -0.007                                  |

| Chr | centiMorgan Position<br>On Decode Map | Marker Name | Cumulative cM | LOD Recurrent<br>Depression | LOD Severe Recurrent<br>Depression | LOD Very Severe<br>Recurrent Depression |
|-----|---------------------------------------|-------------|---------------|-----------------------------|------------------------------------|-----------------------------------------|
| 9   | 164.489                               | D9S2168     | 1889.659      | -0.897                      | -0.438                             | -0.007                                  |
| 10  | 1.19                                  | D10S249     | 1890.849      | 0.263                       | 0.133                              | -0.002                                  |
| 10  | 5.71                                  | D10S602     | 1895.369      | 0.145                       | 0.066                              | -0.018                                  |
| 10  | 11.297                                | D10S1218    | 1900.956      | 0.106                       | 0.003                              | -0.031                                  |
| 10  | 14.952                                | D10S591     | 1904.611      | 0.025                       | -0.007                             | -0.031                                  |
| 10  | 20.561                                | D10S189     | 1910.22       | 0.204                       | 0.057                              | 0.033                                   |
| 10  | 26.554                                | D10S1649    | 1916.213      | 0.757                       | 0.203                              | 0.19                                    |
| 10  | 32.113                                | D10S1430    | 1921.772      | 0.84                        | 0.16                               | 0.251                                   |
| 10  | 32.732                                | D10S570     | 1922.391      | 0.892                       | 0.174                              | 0.269                                   |
| 10  | 37.42                                 | D10S191     | 1927.079      | 1.289                       | 0.335                              | 0.519                                   |
| 10  | 38.925                                | D10S1653    | 1928.584      | 1.593                       | 0.603                              | 0.728                                   |
| 10  | 41.399                                | D10S1661    | 1931.058      | 1.196                       | 0.468                              | 1.018                                   |
| 10  | 44.682                                | D10S548     | 1934.341      | 1.018                       | 0.4                                | 1.108                                   |
| 10  | 48.923                                | D10S1673    | 1938.582      | 0.346                       | 0.071                              | 0.825                                   |
| 10  | 54.324                                | D10S600     | 1943.983      | 0.383                       | 0.272                              | 1.111                                   |
| 10  | 56.479                                | D10S213     | 1946.138      | 0.169                       | 0.166                              | 0.837                                   |
| 10  | 61.446                                | D10S208     | 1951.105      | 0.086                       | 0.058                              | 0.609                                   |
| 10  | 65.421                                | D10S1746    | 1955.08       | 0.046                       | 0.019                              | 0.31                                    |
| 10  | 70.619                                | D10S1772    | 1960.278      | 0.054                       | 0.056                              | 0.126                                   |
| 10  | 71.951                                | D10S196     | 1961.61       | 0.088                       | 0.075                              | 0.176                                   |
| 10  | 74.88                                 | D10S539     | 1964.539      | 0.17                        | 0.052                              | 0.21                                    |
| 10  | 82.334                                | D10S609     | 1971.993      | 0.229                       | 0.033                              | 0.203                                   |
| 10  | 87.205                                | D10S1647    | 1976.864      | 0.158                       | 0.012                              | 0.047                                   |
| 10  | 91.456                                | D10S537     | 1981.115      | 0.483                       | 0.065                              | 0.07                                    |
| 10  | 96.988                                | D10S556     | 1986.647      | 0.414                       | 0.146                              | 0.079                                   |
| 10  | 97.935                                | D10S580     | 1987.594      | 0.374                       | 0.132                              | 0.073                                   |
| 10  | 100.715                               | D10S1677    | 1990.374      | 0.189                       | 0.024                              | 0.035                                   |
| 10  | 104.57                                | D10S1761    | 1994.229      | 0.164                       | 0.017                              | 0                                       |
| 10  | 108.261                               | D10S1658    | 1997.92       | 0.021                       | 0                                  | 0.026                                   |
| 10  | 110.538                               | D10S1765    | 2000.197      | 0.142                       | 0.025                              | 0.072                                   |
| 10  | 113.418                               | D10S1753    | 2003.077      | 0.203                       | 0.127                              | 0.196                                   |
| 10  | 114.189                               | D10S536     | 2003.848      | 0.163                       | 0.099                              | 0.166                                   |
| 10  | 116.043                               | D10S185     | 2005.702      | 0.127                       | 0.146                              | 0.097                                   |
| 10  | 120.748                               | D10S1709    | 2010.407      | 0.062                       | 0.198                              | 0.144                                   |
| 10  | 122.52                                | D10S1726    | 2012.179      | 0.017                       | 0.114                              | 0.132                                   |
| 10  | 123.571                               | D10S192     | 2013.23       | 0.013                       | 0.102                              | 0.118                                   |
| 10  | 125.146                               | D10S1267    | 2014.805      | 0.005                       | 0.033                              | 0.119                                   |
| 10  | 129.567                               | D10S597     | 2019.226      | -0.002                      | 0.051                              | 0.295                                   |



| Chr | centiMorgan Position<br>On Decode Map | Marker Name | Cumulative cM | LOD Recurrent<br>Depression | LOD Severe Recurrent<br>Depression | LOD Very Severe<br>Recurrent Depression |
|-----|---------------------------------------|-------------|---------------|-----------------------------|------------------------------------|-----------------------------------------|
| 10  | 137.871                               | D10S562     | 2027.53       | -0.007                      | 0.005                              | 0.381                                   |
| 10  | 139.224                               | D10S1773    | 2028.883      | 0                           | 0.006                              | 0.466                                   |
| 10  | 141.504                               | D10S1693    | 2031.163      | 0.026                       | 0.01                               | 0.312                                   |
| 10  | 143.14                                | D10S1236    | 2032.799      | 0.018                       | -0.001                             | 0.215                                   |
| 10  | 152.266                               | D10S587     | 2041.925      | 0.025                       | -0.073                             | 0.336                                   |
| 10  | 153.932                               | D10S1723    | 2043.591      | 0.001                       | -0.148                             | 0.306                                   |
| 10  | 154.802                               | D10S1656    | 2044.461      | 0.003                       | -0.125                             | 0.349                                   |
| 10  | 160.194                               | D10S575     | 2049.853      | 0.011                       | -0.25                              | 0.198                                   |
| 10  | 163.607                               | D10S217     | 2053.266      | 0.03                        | -0.176                             | 0.044                                   |
| 10  | 164.599                               | D10S1676    | 2054.258      | 0.027                       | -0.148                             | 0.024                                   |
| 10  | 170.209                               | D10S1655    | 2059.868      | 0.068                       | 0.001                              | 0.061                                   |
| 10  | 175.52                                | D10S169     | 2065.179      | 0.007                       | 0.011                              | 0.013                                   |
| 10  | 176.242                               | D10S1651    | 2065.901      | -0.005                      | 0                                  | 0.009                                   |
| 10  | 181.655                               | D10S212     | 2071.314      | -0.013                      | 0.001                              | 0.048                                   |
| 10  | 183.595                               | D10S1700    | 2073.254      | -0.021                      | -0.006                             | 0.039                                   |
| 11  | 1.293                                 | D11S4046    | 2074.547      | 0.022                       | 0.085                              | -0.11                                   |
| 11  | 2.485                                 | D11S1318    | 2075.739      | 0.034                       | 0.087                              | -0.097                                  |
| 11  | 5.479                                 | D11S4146    | 2078.733      | 0.02                        | 0.081                              | -0.041                                  |
| 11  | 8.786                                 | D11S1760    | 2082.04       | 0.123                       | 0.402                              | 0.124                                   |
| 11  | 12.38                                 | D11S1331    | 2085.634      | 0.175                       | 0.524                              | 0.124                                   |
| 11  | 16.388                                | D11S4149    | 2089.642      | 0.284                       | 0.506                              | 0.075                                   |
| 11  | 17.473                                | D11S1999    | 2090.727      | 0.321                       | 0.575                              | 0.104                                   |
| 11  | 23.403                                | D11S4170    | 2096.657      | 0.152                       | 0.259                              | 0.018                                   |
| 11  | 26.226                                | D11S902     | 2099.48       | 0.161                       | 0.164                              | 0.026                                   |
| 11  | 29.323                                | D11S2368    | 2102.577      | 0.186                       | 0.107                              | 0.007                                   |
| 11  | 34.902                                | D11S928     | 2108.156      | 0.196                       | 0.031                              | 0.013                                   |
| 11  | 38.503                                | D11S1359    | 2111.757      | 0.057                       | -0.029                             | 0.01                                    |
| 11  | 43.286                                | D11S4080    | 2116.54       | 0.03                        | -0.144                             | 0.091                                   |
| 11  | 48.004                                | D11S914     | 2121.258      | -0.009                      | -0.261                             | 0.009                                   |
| 11  | 49.461                                | D11S1776    | 2122.715      | -0.015                      | -0.176                             | 0.005                                   |
| 11  | 51.978                                | D11S907     | 2125.232      | 0.001                       | -0.043                             | 0.018                                   |
| 11  | 55.391                                | D11S4102    | 2128.645      | -0.026                      | -0.053                             | 0.005                                   |
| 11  | 58.178                                | D11S1360    | 2131.432      | -0.004                      | 0                                  | 0.034                                   |
| 11  | 59.334                                | D11S1785    | 2132.588      | 0.003                       | 0.025                              | 0.06                                    |
| 11  | 60.942                                | D11S903     | 2134.196      | 0.008                       | 0.027                              | 0.059                                   |
| 11  | 66.18                                 | D11S4191    | 2139.434      | 0.156                       | 0.129                              | 0.088                                   |
| 11  | 70.273                                | D11S4205    | 2143.527      | 0.534                       | 0.258                              | 0.141                                   |
| 11  | 73.806                                | D11S4087    | 2147.06       | 0.79                        | 0.379                              | 0.112                                   |

| Chr | centiMorgan Position<br>On Decode Map | Marker Name | Cumulative cM | LOD Recurrent<br>Depression | LOD Severe Recurrent<br>Depression | LOD Very Severe<br>Recurrent Depression |
|-----|---------------------------------------|-------------|---------------|-----------------------------|------------------------------------|-----------------------------------------|
| 11  | 79.309                                | D11S4162    | 2152.563      | 1.014                       | 0.545                              | 0.032                                   |
| 11  | 80.354                                | D11S1314    | 2153.608      | 1.128                       | 0.61                               | 0.021                                   |
| 11  | 85.418                                | D11S937     | 2158.672      | 1.795                       | 1.365                              | 0.016                                   |
| 11  | 88.329                                | D11S1362    | 2161.583      | 1.725                       | 1.352                              | 0                                       |
| 11  | 92.14                                 | D11S1887    | 2165.394      | 1.481                       | 0.669                              | -0.036                                  |
| 11  | 94.116                                | D11S1780    | 2167.37       | 1.646                       | 0.725                              | -0.037                                  |
| 11  | 97.141                                | D11S4118    | 2170.395      | 1.404                       | 0.411                              | -0.033                                  |
| 11  | 102.674                               | D11S917     | 2175.928      | 1.175                       | 0.253                              | -0.001                                  |
| 11  | 105.155                               | D11S1317    | 2178.409      | 1.083                       | 0.081                              | -0.005                                  |
| 11  | 107.71                                | D11S1886    | 2180.964      | 1.089                       | 0.073                              | 0.001                                   |
| 11  | 110.805                               | D11S4206    | 2184.059      | 0.606                       | 0.092                              | 0.077                                   |
| 11  | 116.874                               | D11S1327    | 2190.128      | 0.237                       | 0.031                              | 0.005                                   |
| 11  | 118.662                               | D11S908     | 2191.916      | 0.154                       | 0.018                              | 0.008                                   |
| 11  | 122.231                               | D11S4127    | 2195.485      | 0.055                       | 0.008                              | 0.002                                   |
| 11  | 124.673                               | D11S4132    | 2197.927      | 0.046                       | 0.003                              | 0.001                                   |
| 11  | 126.83                                | D11S4089    | 2200.084      | 0.122                       | 0.026                              | 0.026                                   |
| 11  | 131.312                               | D11S4094    | 2204.566      | 0.162                       | 0.044                              | 0.087                                   |
| 11  | 135.659                               | D11S934     | 2208.913      | 0.123                       | 0.172                              | 0.598                                   |
| 11  | 135.733                               | D11S4151    | 2208.987      | 0.122                       | 0.172                              | 0.6                                     |
| 11  | 140.628                               | D11S912     | 2213.882      | 0.148                       | 0.034                              | 0.327                                   |
| 11  | 148.23                                | D11S2367    | 2221.484      | 0                           | -0.1                               | -0.038                                  |
| 11  | 150.173                               | D11S1320    | 2223.427      | 0                           | -0.121                             | -0.04                                   |
| 11  | 154.041                               | D11S969     | 2227.295      | 0                           | -0.281                             | -0.03                                   |
| 11  | 155.836                               | D11S968     | 2229.09       | -0.001                      | -0.354                             | -0.005                                  |
| 12  | 0                                     | D12S352     | 2229.09       | 0.501                       | 0.028                              | -0.001                                  |
| 12  | 4.232                                 | D12S1656    | 2233.322      | 0.478                       | 0.083                              | 0.034                                   |
| 12  | 8.635                                 | D12S372     | 2237.725      | 0.08                        | -0.002                             | 0.013                                   |
| 12  | 13.608                                | D12S1725    | 2242.698      | 0.143                       | -0.024                             | 0                                       |
| 12  | 14.439                                | D12S314     | 2243.529      | 0.248                       | -0.001                             | 0                                       |
| 12  | 16.844                                | D12S374     | 2245.934      | 0.453                       | 0.004                              | 0.021                                   |
| 12  | 24.756                                | D12S336     | 2253.846      | 0.225                       | -0.073                             | -0.07                                   |
| 12  | 26.932                                | D12S1697    | 2256.022      | 0.36                        | -0.041                             | -0.027                                  |
| 12  | 31.966                                | D12S364     | 2261.056      | 0.289                       | -0.177                             | -0.024                                  |
| 12  | 40.077                                | D12S1682    | 2269.167      | 0.344                       | -0.21                              | -0.118                                  |
| 12  | 44.813                                | D12S1591    | 2273.903      | 0.048                       | -0.379                             | -0.3                                    |
| 12  | 46.484                                | D12S1057    | 2275.574      | 0.046                       | -0.419                             | -0.283                                  |
| 12  | 51.799                                | D12S1337    | 2280.889      | 0.054                       | -0.521                             | -0.339                                  |
| 12  | 52.932                                | D12S1704    | 2282.022      | 0.109                       | -0.422                             | -0.287                                  |

| Chr | centiMorgan Position<br>On Decode Map | Marker Name | Cumulative cM | LOD Recurrent<br>Depression | LOD Severe Recurrent<br>Depression | LOD Very Severe<br>Recurrent Depression |
|-----|---------------------------------------|-------------|---------------|-----------------------------|------------------------------------|-----------------------------------------|
| 12  | 54.629                                | D12S1681    | 2283.719      | 0.044                       | -0.513                             | -0.268                                  |
| 12  | 56.47                                 | D12S345     | 2285.56       | -0.004                      | -0.932                             | -0.33                                   |
| 12  | 61.768                                | D12S85      | 2290.858      | -0.051                      | -0.982                             | -0.484                                  |
| 12  | 67.917                                | D12S368     | 2297.007      | -0.019                      | -0.673                             | -0.245                                  |
| 12  | 71.478                                | D12S1707    | 2300.568      | -0.001                      | -0.736                             | -0.09                                   |
| 12  | 75.48                                 | D12S83      | 2304.57       | 0                           | -0.93                              | -0.02                                   |
| 12  | 77.467                                | D12S329     | 2306.557      | -0.002                      | -0.811                             | -0.022                                  |
| 12  | 83.686                                | D12S1294    | 2312.776      | -0.033                      | -0.956                             | -0.065                                  |
| 12  | 85.041                                | D12S313     | 2314.131      | -0.032                      | -0.925                             | -0.072                                  |
| 12  | 89.462                                | D12S1052    | 2318.552      | -0.01                       | -0.361                             | -0.002                                  |
| 12  | 92.97                                 | D12S326     | 2322.06       | 0.046                       | -0.052                             | 0.06                                    |
| 12  | 97.672                                | D12S1708    | 2326.762      | 0.139                       | 0.001                              | 0.089                                   |
| 12  | 103.104                               | D12S351     | 2332.194      | 0.168                       | 0.03                               | 0.108                                   |
| 12  | 104.424                               | D12S95      | 2333.514      | 0.207                       | 0.067                              | 0.154                                   |
| 12  | 106.027                               | D12S1346    | 2335.117      | 0.201                       | 0.1                                | 0.126                                   |
| 12  | 110.591                               | D12S2081    | 2339.681      | 0.099                       | 0.193                              | 0.119                                   |
| 12  | 115.045                               | D12S1727    | 2344.135      | 0.088                       | 0.362                              | 0.071                                   |
| 12  | 116.631                               | D12S1030    | 2345.721      | 0.194                       | 0.437                              | 0.112                                   |
| 12  | 120.165                               | D12S1636    | 2349.255      | 0.457                       | 0.516                              | 0.11                                    |
| 12  | 120.853                               | D12S1683    | 2349.943      | 0.608                       | 0.727                              | 0.243                                   |
| 12  | 124.076                               | D12S1613    | 2353.166      | 0.663                       | 0.758                              | 0.382                                   |
| 12  | 127.22                                | D12S1583    | 2356.31       | 0.453                       | 0.523                              | 0.278                                   |
| 12  | 130.276                               | D12S1616    | 2359.366      | 0.17                        | 0.101                              | 0.066                                   |
| 12  | 133.659                               | D12S354     | 2362.749      | 0.007                       | 0.002                              | -0.012                                  |
| 12  | 134.333                               | D12S369     | 2363.423      | -0.004                      | -0.008                             | -0.045                                  |
| 12  | 140.324                               | D12S366     | 2369.414      | -0.08                       | -0.107                             | -0.717                                  |
| 12  | 144.137                               | D12S2073    | 2373.227      | -0.111                      | -0.041                             | -0.628                                  |
| 12  | 148.984                               | D12S1614    | 2378.074      | -0.051                      | 0.023                              | -0.025                                  |
| 12  | 151.953                               | D12S324     | 2381.043      | -0.05                       | 0.049                              | 0.017                                   |
| 12  | 155.986                               | D12S2078    | 2385.076      | 0                           | 0.063                              | 0.016                                   |
| 12  | 160.719                               | D12S1609    | 2389.809      | 0.264                       | 0.155                              | 0                                       |
| 12  | 163.126                               | D12S1659    | 2392.216      | 0.509                       | 0.322                              | 0.001                                   |
| 12  | 165.267                               | D12S367     | 2394.357      | 0.513                       | 0.373                              | 0                                       |
| 12  | 167.94                                | D12S2069    | 2397.03       | 0.66                        | 0.377                              | 0                                       |
| 12  | 173.293                               | D12S1723    | 2402.383      | 0.247                       | 0.001                              | -0.036                                  |
| 12  | 175.011                               | D12S1638    | 2404.101      | 0.262                       | 0.001                              | -0.019                                  |
| 13  | 0.35                                  | D13S175     | 2404.451      | 0.065                       | 0.059                              | 0.009                                   |
| 13  | 8.981                                 | D13S232     | 2413.082      | 0.093                       | 0.083                              | 0                                       |

| Chr | centiMorgan Position<br>On Decode Map | Marker Name | Cumulative cM | LOD Recurrent<br>Depression | LOD Severe Recurrent<br>Depression | LOD Very Severe<br>Recurrent Depression |
|-----|---------------------------------------|-------------|---------------|-----------------------------|------------------------------------|-----------------------------------------|
| 13  | 11.572                                | D13S1243    | 2415.673      | 0.116                       | 0.278                              | 0                                       |
| 13  | 16.88                                 | D13S221     | 2420.981      | 0.219                       | 0.537                              | 0.036                                   |
| 13  | 22.887                                | D13S217     | 2426.988      | 0.222                       | 0.804                              | 0.034                                   |
| 13  | 28.145                                | D13S289     | 2432.246      | 0.17                        | 0.755                              | 0.001                                   |
| 13  | 31.986                                | D13S171     | 2436.087      | 0.451                       | 0.763                              | 0.023                                   |
| 13  | 36.492                                | D13S219     | 2440.593      | 0.527                       | 0.665                              | 0                                       |
| 13  | 40.44                                 | D13S218     | 2444.541      | 0.348                       | 0.707                              | 0.001                                   |
| 13  | 45.56                                 | D13S325     | 2449.661      | 0.411                       | 0.649                              | -0.001                                  |
| 13  | 49.152                                | D13S326     | 2453.253      | 0.561                       | 0.783                              | 0.002                                   |
| 13  | 54.306                                | D13S272     | 2458.407      | 0.245                       | 0.338                              | -0.017                                  |
| 13  | 60.688                                | D13S1320    | 2464.789      | 0.085                       | 0.346                              | 0.007                                   |
| 13  | 65.825                                | D13S279     | 2469.926      | 0.109                       | 0.712                              | 0.077                                   |
| 13  | 73.301                                | D13S162     | 2477.402      | 0.12                        | 0.724                              | 0.172                                   |
| 13  | 78.012                                | D13S170     | 2482.113      | 0.149                       | 0.645                              | 0.267                                   |
| 13  | 80.33                                 | D13S271     | 2484.431      | 0.246                       | 0.703                              | 0.282                                   |
| 13  | 82.701                                | D13S265     | 2486.802      | 0.438                       | 0.727                              | 0.23                                    |
| 13  | 86.929                                | D13S775     | 2491.03       | 1.011                       | 0.855                              | 0.269                                   |
| 13  | 91.339                                | D13S1241    | 2495.44       | 1.136                       | 0.565                              | 0.058                                   |
| 13  | 94.001                                | D13S1298    | 2498.102      | 0.986                       | 0.439                              | 0.017                                   |
| 13  | 96.008                                | D13S1232    | 2500.109      | 0.64                        | 0.302                              | -0.001                                  |
| 13  | 97.86                                 | D13S779     | 2501.961      | 0.469                       | 0.23                               | -0.024                                  |
| 13  | 100.656                               | D13S1256    | 2504.757      | 0.213                       | 0.061                              | -0.119                                  |
| 13  | 102.389                               | D13S274     | 2506.49       | 0.086                       | 0                                  | -0.333                                  |
| 13  | 107.618                               | D13S797     | 2511.719      | 0.009                       | -0.209                             | -0.326                                  |
| 13  | 112.167                               | D13S796     | 2516.268      | 0.002                       | -0.308                             | -0.164                                  |
| 13  | 115.544                               | D13S778     | 2519.645      | -0.002                      | -0.301                             | -0.128                                  |
| 13  | 118.998                               | D13S1315    | 2523.099      | -0.012                      | -0.237                             | -0.077                                  |
| 13  | 125.023                               | D13S261     | 2529.124      | -0.066                      | -0.273                             | -0.192                                  |
| 13  | 126.858                               | D13S285     | 2530.959      | -0.113                      | -0.307                             | -0.207                                  |
| 13  | 131.92                                | D13S293     | 2536.021      | -0.162                      | -0.309                             | -0.184                                  |
| 14  | 4.517                                 | D14S261     | 2540.538      | -0.463                      | -0.408                             | -0.2                                    |
| 14  | 9.826                                 | D14S1043    | 2545.847      | -0.351                      | -0.432                             | -0.204                                  |
| 14  | 9.876                                 | D14S1023    | 2545.897      | -0.346                      | -0.424                             | -0.202                                  |
| 14  | 15.375                                | D14S283     | 2551.396      | -0.448                      | -0.497                             | -0.396                                  |
| 14  | 16.121                                | D14S990     | 2552.142      | -0.356                      | -0.486                             | -0.362                                  |
| 14  | 19.33                                 | D14S972     | 2555.351      | -0.051                      | -0.079                             | -0.187                                  |
| 14  | 21.686                                | D14S1032    | 2557.707      | 0.002                       | 0.002                              | -0.013                                  |
| 14  | 23.036                                | D14S1280    | 2559.057      | 0.007                       | 0.01                               | -0.003                                  |

| Chr | centiMorgan Position<br>On Decode Map | Marker Name | Cumulative cM | LOD Recurrent<br>Depression | LOD Severe Recurrent<br>Depression | LOD Very Severe<br>Recurrent Depression |
|-----|---------------------------------------|-------------|---------------|-----------------------------|------------------------------------|-----------------------------------------|
| 14  | 25.731                                | D14S262     | 2561.752      | 0.005                       | 0                                  | -0.006                                  |
| 14  | 29.187                                | D14S1071    | 2565.208      | 0.005                       | -0.003                             | -0.011                                  |
| 14  | 34.998                                | D14S741     | 2571.019      | 0.078                       | 0.003                              | -0.136                                  |
| 14  | 37.632                                | D14S70      | 2573.653      | 0.105                       | 0.024                              | -0.076                                  |
| 14  | 39.409                                | D14S1014    | 2575.43       | 0.16                        | 0.127                              | -0.006                                  |
| 14  | 41.356                                | D14S75      | 2577.377      | 0.114                       | 0.082                              | -0.025                                  |
| 14  | 44.875                                | D14S552     | 2580.896      | 0.045                       | 0.001                              | -0.097                                  |
| 14  | 46.804                                | D14S976     | 2582.825      | 0.02                        | -0.003                             | -0.183                                  |
| 14  | 50.46                                 | D14S978     | 2586.481      | 0.051                       | -0.035                             | -0.152                                  |
| 14  | 53.425                                | D14S747     | 2589.446      | 0.178                       | 0.001                              | -0.151                                  |
| 14  | 56.023                                | D14S276     | 2592.044      | 0.373                       | 0.022                              | -0.019                                  |
| 14  | 58.402                                | D14S980     | 2594.423      | 0.494                       | 0.023                              | -0.001                                  |
| 14  | 59.819                                | D14S274     | 2595.84       | 0.437                       | 0.015                              | -0.001                                  |
| 14  | 65.632                                | D14S982     | 2601.653      | 0.29                        | -0.057                             | -0.108                                  |
| 14  | 68.32                                 | D14S1069    | 2604.341      | 0.085                       | -0.099                             | -0.12                                   |
| 14  | 68.321                                | D14S1065    | 2604.342      | 0.085                       | -0.099                             | -0.12                                   |
| 14  | 69.675                                | D14S1011    | 2605.696      | 0.108                       | -0.091                             | -0.131                                  |
| 14  | 70.399                                | D14S258     | 2606.42       | 0.2                         | -0.079                             | -0.073                                  |
| 14  | 74.334                                | D14S986     | 2610.355      | 0.434                       | -0.029                             | -0.18                                   |
| 14  | 74.941                                | D14S1433    | 2610.962      | 0.379                       | -0.033                             | -0.206                                  |
| 14  | 80.165                                | D14S74      | 2616.186      | 0.282                       | -0.009                             | -0.254                                  |
| 14  | 85.448                                | D14S616     | 2621.469      | 0.189                       | -0.008                             | -0.274                                  |
| 14  | 86.384                                | D14S974     | 2622.405      | 0.172                       | -0.003                             | -0.259                                  |
| 14  | 88.656                                | D14S67      | 2624.677      | 0.07                        | -0.001                             | -0.185                                  |
| 14  | 92.856                                | D14S1044    | 2628.877      | 0.142                       | 0.087                              | -0.011                                  |
| 14  | 96.753                                | D14S280     | 2632.774      | 0.016                       | 0.039                              | -0.01                                   |
| 14  | 96.807                                | D14S617     | 2632.828      | 0.016                       | 0.039                              | -0.01                                   |
| 14  | 97.687                                | D14S1050    | 2633.708      | 0.029                       | 0.036                              | -0.028                                  |
| 14  | 99.251                                | D14S81      | 2635.272      | 0.005                       | 0.052                              | -0.007                                  |
| 14  | 102.52                                | D14S1054    | 2638.541      | 0.031                       | 0.07                               | -0.004                                  |
| 14  | 106.216                               | D14S987     | 2642.237      | 0.006                       | 0.043                              | 0                                       |
| 14  | 109.097                               | D14S65      | 2645.118      | 0.006                       | 0.032                              | 0.014                                   |
| 14  | 109.308                               | D14S1019    | 2645.329      | 0.005                       | 0.03                               | 0.012                                   |
| 14  | 117.805                               | D14S1426    | 2653.826      | -0.001                      | -0.003                             | -0.033                                  |
| 14  | 118.781                               | D14S985     | 2654.802      | 0                           | 0                                  | -0.033                                  |
| 14  | 125.03                                | D14S293     | 2661.051      | 0.095                       | 0.109                              | 0.005                                   |
| 14  | 126.06                                | D14S542     | 2662.081      | 0.104                       | 0.139                              | 0.01                                    |
| 15  | 6.06                                  | D15S128     | 2668.141      | 0.423                       | 0.162                              | 0.156                                   |

| Chr | centiMorgan Position<br>On Decode Map | Marker Name | Cumulative cM | LOD Recurrent<br>Depression | LOD Severe Recurrent<br>Depression | LOD Very Severe<br>Recurrent Depression |
|-----|---------------------------------------|-------------|---------------|-----------------------------|------------------------------------|-----------------------------------------|
| 15  | 11.147                                | D15S97      | 2673.228      | 0.351                       | 0.045                              | 0.007                                   |
| 15  | 13.46                                 | D15S975     | 2675.541      | 0.631                       | 0.216                              | 0.032                                   |
| 15  | 15.596                                | D15S156     | 2677.677      | 0.755                       | 0.266                              | 0.01                                    |
| 15  | 21.441                                | D15S1019    | 2683.522      | 0.47                        | 0.159                              | -0.006                                  |
| 15  | 23.509                                | D15S165     | 2685.59       | 0.451                       | 0.159                              | -0.008                                  |
| 15  | 27.428                                | D15S231     | 2689.509      | 0.222                       | 0.023                              | -0.187                                  |
| 15  | 29.843                                | D15S995     | 2691.924      | 0.144                       | 0                                  | -0.28                                   |
| 15  | 30.953                                | D15S1040    | 2693.034      | 0.119                       | -0.012                             | -0.305                                  |
| 15  | 35.231                                | D15S118     | 2697.312      | 0.068                       | -0.08                              | -0.078                                  |
| 15  | 39.389                                | D15S1012    | 2701.47       | 0.004                       | -0.23                              | -0.075                                  |
| 15  | 43.142                                | D15S146     | 2705.223      | -0.004                      | -0.549                             | -0.198                                  |
| 15  | 43.884                                | D15S214     | 2705.965      | -0.003                      | -0.608                             | -0.17                                   |
| 15  | 45.936                                | D15S659     | 2708.017      | 0.001                       | -0.626                             | -0.102                                  |
| 15  | 51.648                                | D15S1032    | 2713.729      | -0.008                      | -0.545                             | -0.13                                   |
| 15  | 52.712                                | D15S1016    | 2714.793      | -0.009                      | -0.498                             | -0.155                                  |
| 15  | 58.089                                | D15S117     | 2720.17       | 0.027                       | -0.063                             | -0.012                                  |
| 15  | 60.402                                | D15S148     | 2722.483      | 0.007                       | -0.074                             | -0.022                                  |
| 15  | 65.913                                | D15S1036    | 2727.994      | 0.002                       | -0.126                             | -0.074                                  |
| 15  | 68.151                                | D15S1507    | 2730.232      | 0.064                       | -0.069                             | -0.03                                   |
| 15  | 70.386                                | D15S988     | 2732.467      | 0.173                       | -0.002                             | 0                                       |
| 15  | 75.088                                | D15S216     | 2737.169      | 0.301                       | 0.041                              | 0.029                                   |
| 15  | 78.132                                | D15S145     | 2740.213      | 0.505                       | 0.154                              | 0.102                                   |
| 15  | 82.513                                | D15S114     | 2744.594      | 0.729                       | 0.326                              | 0.143                                   |
| 15  | 86.488                                | D15S1005    | 2748.569      | 0.719                       | 0.541                              | 0.179                                   |
| 15  | 88.194                                | D15S1047    | 2750.275      | 0.944                       | 0.581                              | 0.19                                    |
| 15  | 91.764                                | D15S999     | 2753.845      | 1.414                       | 0.783                              | 0.18                                    |
| 15  | 95.738                                | D15S979     | 2757.819      | 0.945                       | 0.277                              | 0.11                                    |
| 15  | 100.888                               | D15S158     | 2762.969      | 0.046                       | -0.013                             | 0.186                                   |
| 15  | 102.568                               | D15S652     | 2764.649      | 0.052                       | -0.02                              | 0.303                                   |
| 15  | 110.278                               | D15S649     | 2772.359      | 0.006                       | -0.134                             | 0.108                                   |
| 15  | 110.612                               | D15S1004    | 2772.693      | 0.008                       | -0.126                             | 0.101                                   |
| 15  | 111.551                               | D15S130     | 2773.632      | 0                           | -0.109                             | 0.098                                   |
| 15  | 114.36                                | D15S816     | 2776.441      | 0                           | -0.081                             | 0.189                                   |
| 15  | 116.137                               | D15S157     | 2778.218      | 0.001                       | -0.043                             | 0.237                                   |
| 15  | 120.029                               | D15S657     | 2782.11       | -0.058                      | -0.068                             | 0.25                                    |
| 15  | 123.83                                | D15S1014    | 2785.911      | -0.08                       | -0.034                             | 0.273                                   |
| 15  | 124.465                               | D15S212     | 2786.546      | -0.105                      | -0.03                              | 0.27                                    |
| 15  | 127.947                               | D15S966     | 2790.028      | -0.001                      | 0.06                               | 0.552                                   |

| Chr | centiMorgan Position<br>On Decode Map | Marker Name | Cumulative cM | LOD Recurrent<br>Depression | LOD Severe Recurrent<br>Depression | LOD Very Severe<br>Recurrent Depression |
|-----|---------------------------------------|-------------|---------------|-----------------------------|------------------------------------|-----------------------------------------|
| 15  | 130.403                               | D15S120     | 2792.484      | 0.001                       | 0.141                              | 0.494                                   |
| 16  | 8.189                                 | D16S521     | 2800.673      | -1.242                      | -0.489                             | -0.352                                  |
| 16  | 8.285                                 | D16S3395    | 2800.769      | -1.235                      | -0.498                             | -0.366                                  |
| 16  | 10.636                                | D16S3065    | 2803.12       | -1.078                      | -0.678                             | -0.497                                  |
| 16  | 14.968                                | D16S423     | 2807.452      | -0.413                      | -0.445                             | -0.509                                  |
| 16  | 20.609                                | D16S418     | 2813.093      | -0.147                      | -0.135                             | -0.219                                  |
| 16  | 25.526                                | D16S3087    | 2818.01       | -0.062                      | -0.119                             | -0.301                                  |
| 16  | 26.041                                | D16S404     | 2818.525      | -0.079                      | -0.137                             | -0.328                                  |
| 16  | 29.513                                | D16S519     | 2821.997      | -0.042                      | 0                                  | -0.237                                  |
| 16  | 30.746                                | D16S3075    | 2823.23       | -0.011                      | 0.002                              | -0.09                                   |
| 16  | 32.066                                | D16S3062    | 2824.55       | 0.02                        | 0.073                              | -0.028                                  |
| 16  | 33.908                                | D16S500     | 2826.392      | 0.064                       | 0.159                              | 0.001                                   |
| 16  | 41.834                                | D16S410     | 2834.318      | 0.114                       | 0.086                              | 0.136                                   |
| 16  | 43.425                                | D16S3041    | 2835.909      | 0.077                       | 0.053                              | 0.132                                   |
| 16  | 47.294                                | D16S403     | 2839.778      | 0.011                       | 0.001                              | 0.07                                    |
| 16  | 51.268                                | D16S3068    | 2843.752      | 0.023                       | -0.007                             | 0.036                                   |
| 16  | 54.415                                | D16S3145    | 2846.899      | -0.045                      | -0.144                             | -0.007                                  |
| 16  | 61.1                                  | D16S3080    | 2853.584      | -0.28                       | -0.36                              | -0.17                                   |
| 16  | 62.362                                | D16S3136    | 2854.846      | -0.263                      | -0.449                             | -0.225                                  |
| 16  | 65.346                                | D16S2623    | 2857.83       | -0.295                      | -0.712                             | -0.307                                  |
| 16  | 68.274                                | D16S3034    | 2860.758      | -0.327                      | -0.695                             | -0.246                                  |
| 16  | 69.142                                | D16S415     | 2861.626      | -0.28                       | -0.636                             | -0.229                                  |
| 16  | 70.984                                | D16S3253    | 2863.468      | -0.253                      | -0.543                             | -0.174                                  |
| 16  | 76.359                                | D16S3057    | 2868.843      | -0.307                      | -0.681                             | -0.166                                  |
| 16  | 78.052                                | D16S3038    | 2870.536      | -0.384                      | -0.849                             | -0.227                                  |
| 16  | 83.448                                | D16S514     | 2875.932      | -0.656                      | -1.488                             | -0.367                                  |
| 16  | 84.309                                | D16S503     | 2876.793      | -0.561                      | -1.282                             | -0.386                                  |
| 16  | 86.592                                | D16S3019    | 2879.076      | -0.773                      | -1.283                             | -0.594                                  |
| 16  | 91.199                                | D16S3066    | 2883.683      | -0.795                      | -1.434                             | -0.33                                   |
| 16  | 94.692                                | D16S515     | 2887.176      | -0.518                      | -1.436                             | -0.405                                  |
| 16  | 98.849                                | D16S3029    | 2891.333      | -0.479                      | -1.741                             | -1.067                                  |
| 16  | 101.239                               | D16S516     | 2893.723      | -0.248                      | -1.432                             | -0.706                                  |
| 16  | 101.711                               | D16S504     | 2894.195      | -0.247                      | -1.405                             | -0.689                                  |
| 16  | 108.071                               | D16S505     | 2900.555      | -0.39                       | -1.251                             | -0.577                                  |
| 16  | 112.785                               | D16S3091    | 2905.269      | -0.3                        | -0.828                             | -0.482                                  |
| 16  | 120.627                               | D16S763     | 2913.111      | -0.26                       | -0.551                             | -0.141                                  |
| 16  | 126.833                               | D16S520     | 2919.317      | -0.001                      | -0.295                             | -0.051                                  |
| 16  | 131.456                               | D16S2621    | 2923.94       | -0.01                       | -0.314                             | -0.007                                  |

| Chr | centiMorgan Position<br>On Decode Map | Marker Name | Cumulative cM | LOD Recurrent<br>Depression | LOD Severe Recurrent<br>Depression | LOD Very Severe<br>Recurrent Depression |
|-----|---------------------------------------|-------------|---------------|-----------------------------|------------------------------------|-----------------------------------------|
| 17  | 0.067                                 | D17S849     | 2924.007      | 0.056                       | -0.002                             | 0.27                                    |
| 17  | 2.997                                 | D17S1529    | 2926.937      | 0.007                       | -0.004                             | 0.161                                   |
| 17  | 7.467                                 | D17S831     | 2931.407      | -0.001                      | -0.007                             | 0.11                                    |
| 17  | 11.896                                | D17S1876    | 2935.836      | -0.077                      | -0.009                             | 0.09                                    |
| 17  | 14.272                                | D17S1854    | 2938.212      | -0.104                      | -0.013                             | 0.104                                   |
| 17  | 16.789                                | D17S1832    | 2940.729      | -0.066                      | 0.001                              | 0.137                                   |
| 17  | 21.088                                | D17S960     | 2945.028      | -0.416                      | -0.119                             | 0.018                                   |
| 17  | 25.051                                | D17S1791    | 2948.991      | -0.799                      | -0.27                              | 0.001                                   |
| 17  | 28.957                                | D17S804     | 2952.897      | -0.606                      | -0.123                             | 0.01                                    |
| 17  | 30.961                                | D17S520     | 2954.901      | -0.403                      | -0.031                             | 0.013                                   |
| 17  | 35.154                                | D17S969     | 2959.094      | -0.399                      | -0.041                             | -0.027                                  |
| 17  | 37.942                                | D17S799     | 2961.882      | -0.128                      | 0.002                              | -0.01                                   |
| 17  | 41.551                                | D17S922     | 2965.491      | -0.062                      | 0.02                               | -0.017                                  |
| 17  | 43.765                                | D17S839     | 2967.705      | -0.009                      | 0.056                              | -0.007                                  |
| 17  | 47.635                                | D17S1857    | 2971.575      | 0.018                       | 0.471                              | 0.133                                   |
| 17  | 51.171                                | D17S1871    | 2975.111      | 0.042                       | 0.557                              | 0.227                                   |
| 17  | 53.223                                | D17S1824    | 2977.163      | 0.01                        | 0.531                              | 0.297                                   |
| 17  | 58.941                                | D17S2194    | 2982.881      | -0.022                      | 0.264                              | 0.016                                   |
| 17  | 63.203                                | D17S1842    | 2987.143      | -0.001                      | 0.34                               | 0.052                                   |
| 17  | 66.959                                | D17S1867    | 2990.899      | 0.03                        | 0.501                              | 0.173                                   |
| 17  | 69.325                                | D17S1818    | 2993.265      | 0.02                        | 0.497                              | 0.155                                   |
| 17  | 71.133                                | D17S1299    | 2995.073      | 0.059                       | 0.534                              | 0.117                                   |
| 17  | 76.3                                  | D17S1868    | 3000.24       | 0.022                       | 0.367                              | 0.006                                   |
| 17  | 77.303                                | D17S1795    | 3001.243      | 0.007                       | 0.286                              | -0.001                                  |
| 17  | 80.863                                | D17S788     | 3004.803      | -0.107                      | 0.003                              | -0.351                                  |
| 17  | 83.22                                 | D17S787     | 3007.16       | -0.14                       | -0.008                             | -0.442                                  |
| 17  | 89.636                                | D17S957     | 3013.576      | -0.065                      | -0.017                             | -0.29                                   |
| 17  | 90.359                                | D17S1290    | 3014.299      | -0.095                      | -0.057                             | -0.349                                  |
| 17  | 94.361                                | D17S794     | 3018.301      | -0.078                      | -0.281                             | -0.516                                  |
| 17  | 95.11                                 | D17S944     | 3019.05       | -0.069                      | -0.34                              | -0.506                                  |
| 17  | 97.33                                 | D17S1874    | 3021.27       | -0.154                      | -0.443                             | -0.236                                  |
| 17  | 101.989                               | D17S789     | 3025.929      | -0.001                      | -0.269                             | -0.022                                  |
| 17  | 102.596                               | D17S940     | 3026.536      | -0.005                      | -0.309                             | -0.045                                  |
| 17  | 105.506                               | D17S949     | 3029.446      | 0                           | -0.214                             | -0.04                                   |
| 17  | 108.829                               | D17S1351    | 3032.769      | -0.069                      | -0.181                             | -0.068                                  |
| 17  | 110.904                               | D17S1862    | 3034.844      | -0.106                      | -0.19                              | -0.042                                  |
| 17  | 115.639                               | D17S929     | 3039.579      | -0.152                      | -0.244                             | -0.036                                  |
| 17  | 117.82                                | D17S1603    | 3041.76       | -0.489                      | -0.453                             | -0.138                                  |



| Chr | centiMorgan Position<br>On Decode Map | Marker Name | Cumulative cM | LOD Recurrent<br>Depression | LOD Severe Recurrent<br>Depression | LOD Very Severe<br>Recurrent Depression |
|-----|---------------------------------------|-------------|---------------|-----------------------------|------------------------------------|-----------------------------------------|
| 17  | 118.936                               | D17S2192    | 3042.876      | -0.448                      | -0.396                             | -0.103                                  |
| 17  | 123.715                               | D17S802     | 3047.655      | -0.393                      | -0.257                             | -0.022                                  |
| 17  | 126.708                               | D17S1847    | 3050.648      | -0.224                      | -0.104                             | 0.001                                   |
| 17  | 128.025                               | D17S836     | 3051.965      | -0.357                      | -0.221                             | -0.001                                  |
| 17  | 132.738                               | D17S784     | 3056.678      | -0.127                      | -0.218                             | 0                                       |
| 18  | 4.054                                 | D18S1105    | 3060.732      | 0.114                       | 0.007                              | -0.134                                  |
| 18  | 9.837                                 | D18S63      | 3066.515      | 0.026                       | -0.003                             | -0.382                                  |
| 18  | 14.444                                | D18S1132    | 3071.122      | 0.025                       | 0                                  | -0.582                                  |
| 18  | 18.348                                | D18S452     | 3075.026      | 0.055                       | 0.011                              | -0.3                                    |
| 18  | 21.744                                | D18S967     | 3078.422      | 0.079                       | 0.011                              | -0.284                                  |
| 18  | 26.031                                | D18S1163    | 3082.709      | 0.051                       | -0.002                             | -0.206                                  |
| 18  | 28.854                                | D18S843     | 3085.532      | 0.005                       | -0.002                             | -0.302                                  |
| 18  | 33.37                                 | D18S464     | 3090.048      | 0                           | -0.092                             | -0.334                                  |
| 18  | 38.814                                | D18S53      | 3095.492      | -0.02                       | -0.108                             | -0.078                                  |
| 18  | 40.897                                | D18S453     | 3097.575      | -0.001                      | -0.116                             | -0.051                                  |
| 18  | 44.258                                | D18S869     | 3100.936      | -0.008                      | -0.044                             | -0.002                                  |
| 18  | 47.287                                | D18S1107    | 3103.965      | -0.015                      | -0.028                             | 0.015                                   |
| 18  | 52.453                                | D18S478     | 3109.131      | -0.199                      | 0                                  | 0.103                                   |
| 18  | 54.033                                | D18S877     | 3110.711      | -0.354                      | 0                                  | 0.108                                   |
| 18  | 56.514                                | D18S457     | 3113.192      | -0.568                      | 0.007                              | 0.071                                   |
| 18  | 57.594                                | D18S1135    | 3114.272      | -0.603                      | 0.008                              | 0.057                                   |
| 18  | 59.894                                | D18S1102    | 3116.572      | -0.653                      | 0.003                              | 0.014                                   |
| 18  | 62.591                                | D18S468     | 3119.269      | -0.632                      | -0.001                             | 0.051                                   |
| 18  | 67.557                                | D18S1143    | 3124.235      | -0.163                      | 0.104                              | 0.197                                   |
| 18  | 70.781                                | D18S450     | 3127.459      | -0.025                      | 0.329                              | 0.349                                   |
| 18  | 74.788                                | D18S474     | 3131.466      | -0.045                      | 0.092                              | 0.038                                   |
| 18  | 77.608                                | D18S487     | 3134.286      | -0.005                      | 0.1                                | 0.016                                   |
| 18  | 79.594                                | D18S1152    | 3136.272      | 0.012                       | 0.137                              | 0.094                                   |
| 18  | 82.643                                | D18S1129    | 3139.321      | 0.015                       | 0.207                              | 0.165                                   |
| 18  | 84.27                                 | D18S64      | 3140.948      | 0.004                       | 0.144                              | 0.198                                   |
| 18  | 87.196                                | D18S1134    | 3143.874      | 0.056                       | 0.105                              | 0.174                                   |
| 18  | 88.505                                | D18S1147    | 3145.183      | 0.02                        | 0.058                              | 0.083                                   |
| 18  | 91.039                                | D18S68      | 3147.717      | -0.002                      | 0.067                              | 0.031                                   |
| 18  | 92.907                                | D18S465     | 3149.585      | -0.004                      | 0.026                              | -0.007                                  |
| 18  | 96.962                                | D18S979     | 3153.64       | -0.013                      | 0.005                              | -0.047                                  |
| 18  | 102.55                                | D18S485     | 3159.228      | 0.107                       | 0.375                              | 0.018                                   |
| 18  | 106.377                               | D18S469     | 3163.055      | 0.125                       | 0.609                              | 0.203                                   |
| 18  | 111.047                               | D18S1161    | 3167.725      | 0.074                       | 0.401                              | 0.279                                   |

| Chr | centiMorgan Position<br>On Decode Map | Marker Name | Cumulative cM | LOD Recurrent<br>Depression | LOD Severe Recurrent<br>Depression | LOD Very Severe<br>Recurrent Depression |
|-----|---------------------------------------|-------------|---------------|-----------------------------|------------------------------------|-----------------------------------------|
| 18  | 114.659                               | D18S1009    | 3171.337      | 0                           | 0.157                              | 0.08                                    |
| 18  | 117.943                               | D18S554     | 3174.621      | -0.003                      | 0.205                              | 0.071                                   |
| 19  | 0                                     | D19S886     | 3174.621      | -0.003                      | -0.214                             | -0.064                                  |
| 19  | 1.216                                 | D19S883     | 3175.837      | 0                           | -0.217                             | -0.096                                  |
| 19  | 8.627                                 | D19S565     | 3183.248      | 0                           | -0.594                             | -0.213                                  |
| 19  | 10.588                                | D19S591     | 3185.209      | -0.003                      | -0.466                             | -0.226                                  |
| 19  | 11.835                                | D19S424     | 3186.456      | -0.007                      | -0.511                             | -0.319                                  |
| 19  | 15.95                                 | D19S894     | 3190.571      | 0.003                       | -0.196                             | -0.326                                  |
| 19  | 21.675                                | D19S427     | 3196.296      | 0.031                       | -0.039                             | -0.015                                  |
| 19  | 27.04                                 | D19S884     | 3201.661      | 0.085                       | -0.022                             | 0.013                                   |
| 19  | 33.166                                | D19S584     | 3207.787      | -0.003                      | 0.002                              | 0.02                                    |
| 19  | 33.782                                | D19S1165    | 3208.403      | -0.003                      | 0.003                              | 0.016                                   |
| 19  | 37.979                                | D19S226     | 3212.6        | 0.04                        | 0.058                              | 0.006                                   |
| 19  | 38.056                                | D19S179     | 3212.677      | 0.042                       | 0.06                               | 0.007                                   |
| 19  | 43.023                                | D19S593     | 3217.644      | 0.137                       | 0.236                              | 0.437                                   |
| 19  | 47.549                                | D19S566     | 3222.17       | 0.53                        | 0.253                              | 0.545                                   |
| 19  | 51.448                                | D19S932     | 3226.069      | 0.898                       | 0.601                              | 0.581                                   |
| 19  | 55.808                                | D19S414     | 3230.429      | 1.37                        | 0.841                              | 0.482                                   |
| 19  | 57.355                                | D19S225     | 3231.976      | 1.195                       | 0.688                              | 0.323                                   |
| 19  | 63.103                                | D19S208     | 3237.724      | 0.485                       | 0.27                               | 0.079                                   |
| 19  | 68.913                                | D19S223     | 3243.534      | 0.725                       | 0.728                              | 0.166                                   |
| 19  | 72.804                                | D19S217     | 3247.425      | 0.507                       | 0.719                              | 0.195                                   |
| 19  | 73.474                                | D19S903     | 3248.095      | 0.469                       | 0.773                              | 0.199                                   |
| 19  | 78.516                                | D19S902     | 3253.137      | 0.176                       | 0.405                              | 0.198                                   |
| 19  | 84.599                                | D19S867     | 3259.22       | 0.38                        | 0.707                              | 0.421                                   |
| 19  | 85.955                                | D19S246     | 3260.576      | 0.426                       | 0.664                              | 0.412                                   |
| 19  | 94.122                                | DG19S186    | 3268.743      | 0.213                       | 0.388                              | 0.251                                   |
| 19  | 97.251                                | D19S888     | 3271.872      | 0.034                       | 0.131                              | 0.112                                   |
| 19  | 99.842                                | D19S572     | 3274.463      | 0.023                       | 0.027                              | 0.047                                   |
| 19  | 101.769                               | D19S927     | 3276.39       | 0.007                       | 0.021                              | 0.022                                   |
| 19  | 107.708                               | D19S418     | 3282.329      | 0                           | -0.036                             | -0.073                                  |
| 19  | 108.448                               | D19S605     | 3283.069      | 0                           | -0.07                              | -0.074                                  |
| 19  | 113.227                               | D19S573     | 3287.848      | -0.016                      | -0.331                             | -0.09                                   |
| 19  | 113.798                               | D19S254     | 3288.419      | -0.026                      | -0.402                             | -0.105                                  |
| 20  | 2.992                                 | D20S117     | 3291.411      | 0.423                       | 0.508                              | 0.262                                   |
| 20  | 7.685                                 | D20S113     | 3296.104      | 0.352                       | 0.644                              | 0.303                                   |
| 20  | 9.708                                 | D20S842     | 3298.127      | 0.253                       | 0.444                              | 0.19                                    |
| 20  | 13.65                                 | D20S482     | 3302.069      | 0.139                       | 0.359                              | 0.245                                   |

| Chr | centiMorgan Position<br>On Decode Map | Marker Name | Cumulative cM | LOD Recurrent<br>Depression | LOD Severe Recurrent<br>Depression | LOD Very Severe<br>Recurrent Depression |
|-----|---------------------------------------|-------------|---------------|-----------------------------|------------------------------------|-----------------------------------------|
| 20  | 18.301                                | D20S882     | 3306.72       | 0.08                        | 0.238                              | 0.214                                   |
| 20  | 20.471                                | D20S905     | 3308.89       | 0.078                       | 0.188                              | 0.147                                   |
| 20  | 25.351                                | D20S115     | 3313.77       | 0.06                        | 0.013                              | 0.004                                   |
| 20  | 28.289                                | D20S879     | 3316.708      | 0                           | -0.032                             | -0.006                                  |
| 20  | 28.693                                | D20S175     | 3317.112      | -0.004                      | -0.048                             | -0.005                                  |
| 20  | 34.885                                | D20S189     | 3323.304      | -0.067                      | -0.208                             | 0                                       |
| 20  | 40.502                                | D20S852     | 3328.921      | -0.049                      | -0.228                             | 0.026                                   |
| 20  | 42.544                                | D20S904     | 3330.963      | -0.176                      | -0.333                             | 0.008                                   |
| 20  | 45.361                                | D20S112     | 3333.78       | -0.224                      | -0.562                             | -0.036                                  |
| 20  | 49.661                                | D20S432     | 3338.08       | -0.343                      | -0.741                             | -0.088                                  |
| 20  | 52.186                                | D20S912     | 3340.605      | -0.472                      | -0.862                             | -0.415                                  |
| 20  | 56.61                                 | D20S425     | 3345.029      | -0.268                      | -1.108                             | -0.421                                  |
| 20  | 60.732                                | D20S859     | 3349.151      | -0.079                      | -0.819                             | -0.362                                  |
| 20  | 63.189                                | D20S107     | 3351.608      | -0.003                      | -0.492                             | -0.309                                  |
| 20  | 65.635                                | D20S108     | 3354.054      | 0.003                       | -0.289                             | -0.201                                  |
| 20  | 68.058                                | D20S96      | 3356.477      | 0.027                       | -0.146                             | -0.133                                  |
| 20  | 70.965                                | D20S481     | 3359.384      | -0.006                      | -0.382                             | -0.148                                  |
| 20  | 71.234                                | D20S838     | 3359.653      | -0.006                      | -0.384                             | -0.133                                  |
| 20  | 74.081                                | D20S891     | 3362.5        | -0.004                      | -0.263                             | -0.074                                  |
| 20  | 75.467                                | D20S178     | 3363.886      | 0.001                       | -0.14                              | -0.084                                  |
| 20  | 77.419                                | D20S176     | 3365.838      | 0.102                       | -0.051                             | -0.094                                  |
| 20  | 77.422                                | D20S887     | 3365.841      | 0.102                       | -0.05                              | -0.094                                  |
| 20  | 83.326                                | D20S1083    | 3371.745      | 0.148                       | -0.023                             | -0.095                                  |
| 20  | 86.208                                | D20S211     | 3374.627      | 0.203                       | -0.05                              | -0.14                                   |
| 20  | 90.847                                | D20S100     | 3379.266      | 0.186                       | -0.037                             | -0.031                                  |
| 20  | 93.051                                | D20S102     | 3381.47       | 0.186                       | -0.015                             | -0.021                                  |
| 20  | 95.833                                | D20S430     | 3384.252      | 0.394                       | 0.027                              | 0.002                                   |
| 20  | 98.392                                | D20S164     | 3386.811      | 0.274                       | 0.002                              | 0.001                                   |
| 20  | 100.839                               | D20S171     | 3389.258      | 0.22                        | 0                                  | 0.003                                   |
| 21  | 7.227                                 | D21S1904    | 3396.485      | 1.044                       | 0.177                              | -0.006                                  |
| 21  | 8.754                                 | D21S1432    | 3398.012      | 1.025                       | 0.137                              | -0.002                                  |
| 21  | 16.2                                  | D21S1899    | 3405.458      | 1.219                       | 0.018                              | 0                                       |
| 21  | 17.645                                | D21S1905    | 3406.903      | 1.009                       | 0.034                              | 0.001                                   |
| 21  | 20.181                                | D21S1902    | 3409.439      | 0.902                       | 0.074                              | -0.011                                  |
| 21  | 21.471                                | D21S1884    | 3410.729      | 0.694                       | 0.032                              | -0.017                                  |
| 21  | 24.478                                | D21S272     | 3413.736      | 0.609                       | 0.106                              | 0                                       |
| 21  | 25.068                                | D21S1914    | 3414.326      | 0.605                       | 0.137                              | 0.001                                   |
| 21  | 30.284                                | D21S1442    | 3419.542      | 0.739                       | 0.2                                | 0.196                                   |

| Chr | centiMorgan Position<br>On Decode Map | Marker Name | Cumulative cM | LOD Recurrent<br>Depression | LOD Severe Recurrent<br>Depression | LOD Very Severe<br>Recurrent Depression |
|-----|---------------------------------------|-------------|---------------|-----------------------------|------------------------------------|-----------------------------------------|
| 21  | 33.11                                 | D21S1239    | 3422.368      | 0.999                       | 0.269                              | 0.336                                   |
| 21  | 33.346                                | D21S1908    | 3422.604      | 0.983                       | 0.27                               | 0.346                                   |
| 21  | 33.806                                | D21S1909    | 3423.064      | 0.982                       | 0.266                              | 0.342                                   |
| 21  | 38.62                                 | D21S1898    | 3427.878      | 0.786                       | 0.11                               | 0.092                                   |
| 21  | 42.15                                 | D21S1895    | 3431.408      | 0.408                       | 0.01                               | 0.021                                   |
| 21  | 44.036                                | D21S1252    | 3433.294      | 0.407                       | 0.049                              | 0.023                                   |
| 21  | 46.049                                | D21S1919    | 3435.307      | 0.313                       | 0.024                              | 0.007                                   |
| 21  | 46.248                                | D21S270     | 3435.506      | 0.309                       | 0.02                               | 0.006                                   |
| 21  | 48.281                                | D21S1255    | 3437.539      | 0.12                        | -0.013                             | -0.001                                  |
| 21  | 53.267                                | D21S1893    | 3442.525      | 0.003                       | -0.189                             | -0.059                                  |
| 21  | 57.332                                | D21S266     | 3446.59       | 0.009                       | -0.109                             | -0.141                                  |
| 22  | 3.048                                 | D22S420     | 3449.638      | -0.489                      | -0.169                             | -0.023                                  |
| 22  | 6.002                                 | D22S427     | 3452.592      | -0.419                      | -0.147                             | -0.01                                   |
| 22  | 7.098                                 | D22S1638    | 3453.688      | -0.338                      | -0.095                             | -0.002                                  |
| 22  | 15.82                                 | D22S539     | 3462.41       | -0.143                      | -0.037                             | -0.007                                  |
| 22  | 17.977                                | D22S257     | 3464.567      | -0.138                      | -0.046                             | -0.004                                  |
| 22  | 20.026                                | D22S1174    | 3466.616      | -0.134                      | -0.02                              | -0.002                                  |
| 22  | 23.911                                | D22S315     | 3470.501      | -0.057                      | -0.01                              | -0.033                                  |
| 22  | 25.726                                | D22S1154    | 3472.316      | -0.035                      | -0.003                             | -0.042                                  |
| 22  | 32.148                                | D22S1163    | 3478.738      | 0                           | 0.025                              | 0.005                                   |
| 22  | 36.195                                | D22S531     | 3482.785      | -0.007                      | 0.003                              | 0                                       |
| 22  | 38.78                                 | D22S280     | 3485.37       | 0.019                       | 0.06                               | -0.008                                  |
| 22  | 40.834                                | D22S1265    | 3487.424      | 0.047                       | 0.101                              | -0.036                                  |
| 22  | 43.881                                | D22S283     | 3490.471      | 0.167                       | 0.11                               | -0.105                                  |
| 22  | 45.348                                | D22S1177    | 3491.938      | 0.35                        | 0.143                              | -0.094                                  |
| 22  | 48.112                                | D22S1156    | 3494.702      | 0.503                       | 0.31                               | -0.024                                  |
| 22  | 51.075                                | D22S423     | 3497.665      | 0.357                       | 0.287                              | -0.028                                  |
| 22  | 51.211                                | D22S276     | 3497.801      | 0.348                       | 0.291                              | -0.037                                  |
| 22  | 51.967                                | D22S1179    | 3498.557      | 0.343                       | 0.271                              | -0.124                                  |
| 22  | 52.761                                | D22S1165    | 3499.351      | 0.391                       | 0.307                              | -0.14                                   |
| 22  | 59.393                                | D22S928     | 3505.983      | 0.109                       | 0.137                              | -0.241                                  |
| 22  | 60.987                                | D22S444     | 3507.577      | 0.078                       | 0.105                              | -0.189                                  |
| 22  | 63.953                                | D22S1149    | 3510.543      | 0.235                       | 0.207                              | -0.108                                  |
| 22  | 68.417                                | D22S1170    | 3515.007      | 0.114                       | 0.246                              | -0.098                                  |
